# Supplementary material for: Virulence Potential of a Multidrug-Resistant Escherichia coli Strain Belonging to the Emerging Clonal Group ST101-B1 Isolated from Bloodstream Infection
Source: Microorganisms. 2020 May 30;8(6):827. doi: 10.3390/microorganisms8060827 (PMC7355805; doi:10.3390/microorganisms8060827)
Supplement: Supplementary file 1 [file microorganisms-08-00827-s001.zip › Suppl/Table S1 ST101cplx.xlsx]

## Sheet: Table S1
Strain	Year	ST	BioSample accession	Publication data	Location	Host	Infection related	Isolation source	Drug resistance genotype a	MDR genotype	Observation
c83612	1975	5229/88	SAMN07983309	29535301	China	Chicken	No	Cloaca swab	Aminoglycoside: aac(3)-IId, aadA1, aadA2; Beta-lactam: blaEC-13, blaCMY-2; Colistin: mcr-1.1; Phenicol: cmlA1, floR; Sulphonamide: sul2, sul3; Tetracycline: tet(A), tet(M); Trimethoprime: dfrA12; Others: qacL.	Yes
MOD1-EC710	1985	2480/88	SAMN05591519	not available	United States	Human	Yes	Blood	Aminoglycoside: aac(3)-IIa,aph(3')-Ib; Beta-lactam: blaEC-13, blaOXA-2; Sulphonamide: sul1; Tetracycline: tet(A); Others: qacE delta 1	Yes
MOD1-EC6299	1987	101/88	SAMN05464510	29242221	United States	Cricetinae	Missing data	Small intestine	Beta-lactam: blaEC-13	No
MOD1-EC6353	1987	101/88	SAMN05440420	29242221	United States	Parrot	Missing data	Feces	Beta-lactam: blaEC-13	No
MOD1-EC6313	1987	101/88	SAMN05604781	not available	United States	Goat	No	Large intestine	Aminoglycoside: aph(3'')-Ib, aph(3')-Ia, aph(6)-Id; Beta-lactam: blaEC-13; Sulphonamide: sul2; Tetracycline: tet(B)	Yes
MOD1-EC1635	1988	101/88	SAMN05607403	29242221	Canada	Human	Yes	Feces	Beta-lactam: blaEC-13; Tetracycline: tet(B)	No
MOD1-EC6482	1989	2480/88	SAMN04993102	29242221	India	Chicken	Yes	Heart	Amynoglycoside: aph(3'')-Ib, aph(6)-Id; Beta-lactam: blaEC-13, blaTEM-1; MLS: mph(A); Phenicol: catA1; Sulphonamide: sul2; Tetracycline: tet(A); Trimethoprime: dfrA14	Yes
MOD1-EC6536	1990	2480/88	SAMN04993158	29242221	United States	Horse	Yes	Joint cavity	Amynoglycoside: aph(3'')-Ib, APH(6)-Id; Beta-lactam: blaEC-13, blaTEM-1; MLS: Mph(A); Phenicol: catA1; Tetracycline: tet(A); Trimethoprime: dfrA14	Yes
MOD1-EC6527	1990	101/88	SAMN04993149	29242221	India	Chicken	Yes	Blood	Aminoglycoside: aph(3'')-Ib, aph(6)-Id; Beta-lactam: blaEC-13; MLS: mph(A); Phenicol: catA1; Trimethoprime: dfrA14.	Yes
MOD1-EC6523	1990	101/88	SAMN04993145	not available	India	Chicken	Yes	Blood	Aminoglycoside: aph(3'')-Ib, aph(3')-Ia, aph(6)-Id; Beta-lactam: blaEC-13; MLS: mph(A); Phenicol: catA1; Trimethoprime: dfrA14,	Yes
MOD1-EC6525	1990	101/88	SAMN04993147	not available	India	Chicken	Yes	Blood	Aminoglycoside: aph(3'')-Ib, aph(6)-Id; Beta-lactam: blaEC-13; Sulphonamide: sul2	Yes
MOD1-EC1681	1992	101/88	SAMN05607366	29242221	Canada	Bovine	No	Feces	Aminoglycoside: aadA1; Beta-lactam: blaEC-13, Sulphonamide: sul1, sul2; Tetracycline: tet(A); Others: qacE delta 1	Yes	stx1a producer (STEC)
swine62	1999	359/88	SAMN04376800	not available	China	Pig	No	Rectum	Aminoglycoside: aac(3)-IIa, aph(3')-IIa; Beta-lactam: blaEC-13, blaTEM-1; Others: bleO, oqxA, oqxB	Yes
MOD1-EC5269	2000	2480/88	SAMN05440305	not available	United States	Pig	No	Feces	Aminoglycoside: aph(3'')-Ib, aph(3')-Ia, aph(6)-Id; Beta-lactam: blaEC-13, blaTEM-1; Sulphonamide: sul2; Tetracycline: tet(B)	Yes
MOD1-EC5257	2000	2480/88	SAMN05440313	not available	China	Pig	No	Feces	Aminoglycoside: aadA5, aph(3')-Ia, aph(3'')-Ib, aph(6)-Id; Beta-lactam: blaEC-13, blaTEM-1; Sulphonamide: sul2; Tetracycline: tet(A); Trimethoprime: dfrA17; Others: bleO, oqxA, oqxB	Yes
MOD1-EC5043	2002	101/88	SAMN04279371	not available	Mexico	Retail food	No	Pork	Aminoglycoside: aadA1, aph(3'')-Ib, aph(6)-Id, sat2; Beta-lactam: blaEC-13; Sulphonamide: sul2; Tetracycline: tet(B); Trimethoprime: drfA1; Others: bleO	Yes
912	2003	2480/88	SAMN03267484	18957394	Denmark	Pig	No	Feces	Aminoglycoside: aac(3)-IV, aph(3'')-Ib, aph(4)-Ia, aph(6)-Id; Beta-lactam: blaEC-13, blaTEM-1; Sulphonamide: sul2; Tetracycline: tet(X)	Yes
zlp18	2004	101/88	SAMN07983266	29535301	China	Chicken	No	Cloaca swab	Aminoglycoside: aac(3)-IV, aph(4)-Ia; Beta-lactam: blaEC-13, blaCTX-M-14; Colistin: mcr-1.1; Flouroquinolone: qnrS1; MLS: mph(A); Phenicol: catB, floR; Sulphonamide: sul1, sul2, sul3; Tetracycline: tet(A); Others: arr-3, bleO, qacEdelta1.	Yes
HVH 98 (4-5799287)	2004	2480/88	SAMN01885746	not available	Denmark	Human	Yes	Blood	Aminoglycoside: aadA1; Beta-lactam: blaEC-13; Sulphonamide: sul1; Trimethoprime: dfrA1; Others: qacE delta 1	Yes
O160:H31 strain ECO0936	2005	NA/88	ERS357630	28720578	United Kingdom	Human	Yes	Blood	Aminoglycoside: APH(3')-Ia; Beta-lactam: blaEC-13, blaTEM-1; Phenicol: CatA1; MLS: mph(A); Tetracycline: tet(A); Trimethoprime: DfrA14	Yes
GN02393	2005	359/88	SAMN03922968	not available	United States	Human	Yes	Bodily fluid	Aminoglycoside: aph(3'')-Ib, aph(6)-Id; Beta-lactam: blaEC-13;Sulphonamide: sul2; Tetracycline: tet(A); Trimethoprime: dfrA5	Yes
O15:H10 strain ECO1108	2007	2480/88	ERS357686	28720578	United Kingdom	Human	Yes	Blood	Aminoglycoside: AAC(3)-II, AadA1, APH(3'')-Ib, APH(6)-Id; Beta-lactam: blaEC-13, blaTEM-1; Sulphonamide: sul1, sul2; Tetracycline: tet(A); Trimethoprime: DfrA1, Others: qacE delta 1	Yes
EC121	2007	101/88	SAMN12788841	present study	Brazil	Human	Yes	Blood	Aminoglycoside: aac(3)-IVa, aph(3'')-Ib, aph(4)-Ia, aph(6)-Id; Beta-lactam: blaEC-13, blaCTX-M-2, blaTEM-1b; MLS: mdf(A), mph(A); Phenicol: catA1; Sulphonamide: sul1, sul1, sul2; Tetracycline: tet(A); Trimethoprime: dfrA7, dfr14	Yes
JHI_5088	2008	2480/88	SAMEA104317987	not available	United Kingdom	Environmental	No	Barley trial, supplemented with bulky fertilisers	Beta-lactam: blaEC-13	No
K30	2008	2480/88	SAMN06047079	not available	Germany	Not Informed	Missing data	Raw milk	Beta-lactam: blaEC-13	No	stx1a producer (STEC)
NA084	2009	101/88	SAMN04901707	27600040	India	Human	Yes	Urine	Aminoglycoside: aac(3)-IIa, aac(6')-Ib, aac(6')-Ib-cr5, aph(3')-VI; Beta-lactam: blaEC-13, blaCTX-M-15, blaNDM-1, blaOXA-1, blaOXA-2; Phenicol: catA1, catB3; Sulphonamide: sul1; Tetracycline: tet(A); Trimethoprime: dfr7; Others: bleO, rmtC, qacE delta 1	Yes
NA086	2009	101/88	SAMN04910063	27600040	India	Human	Yes	Urine	Aminoglycoside: aac(3)-IIa, aac(6')-Ib-cr5, aph(3')-VI; Beta-lactam: blaEC-13, blaCTX-M-15, blaNDM-1, blaOXA-1, blaOXA-2; Phenicol: catA1, catB3; Sulphonamide: sul1; Tetracycline: tet(A); Trimethoprime: dfr7; Others: bleO, rmtC, qacE delta 2	Yes
NA099	2009	2480/88	SAMN04910092	27600040	India	Human	Yes	Urine	Aminoglycoside: aac(3)-II, aac(3)-IIa, aac(6')-Ib, aph(6)-Id; Beta-lactam: blaEC-13, blaCMY-6, blaCTX-M-15, blaNDM-1, blaOXA-1, blaOXA-2; Phenicol: catA1, catB3; Sulphonamide: sul1; Tetracycline: tet(A); Trimethoprime: dfr7; Others: bleO, rmtC, qacE delta 1	Yes
O86:H51 strain ECO0117	2009	2480/88	ERS356856	28720578	United Kingdom	Human	Yes	Blood	Beta-lactam: blaEC-13	No
E11-3	2009	101/88	SAMN07983305	29535301	China	Chicken	No	Cloaca swab	Aminoglycoside: aac(3)-IV, aph(4)-Ia; Beta-lactam: blaEC-13, blaCTX-M-14; Colistin: mcr-1; Flouroquinolone: qnrS1; MLS (Macrolide, lincosamide and Streptogramin B): mph(A); Phenicol: catB3, floR; Sulphonamide: sul1, sul2, sul3; Tetracycline: tet(A); Others: arr-3, bleO, qacE delta-1.	Yes
2-222-05_S1_C1	2009	5376/88	SAMN02680155	30404930	Tanzania	Human	No	Stool	Aminoglycoside: aph(3'')-Ib, aph(6)-Id; Beta-lactam: blaEC13, blaTEM-1; Sulphonamide: sul2; Tetracycline: tet(A); Trimethoprime: dfrA7; Others: qacE	Yes
2-222-05_S1_C2	2009	5376/89	SAMN02680216	30404930	Tanzania	Human	No	Stool	Aminoglycoside: aph(3'')-Ib, aph(6)-Id; Beta-lactam: blaEC-13, blaTEM-1; Sulphonamide: sul2; Tetracycline: tet(A); Trimethoprime: dfrA7; Others: qacE	Yes
2-222-05_S1_C3	2009	5376/90	SAMN02687472	30404930	Tanzania	Human	No	Stool	Aminoglycoside: aph(3'')-Ib, aph(6)-Id; Beta-lactam: blaEC-13, blaTEM-1; Sulphonamide: sul2; Tetracycline: tet(A); Trimethoprime: dfrA7; Others: qacE	Yes
3-267-03_S3_C2	2009	101/88	SAMN02680188	30404930	Tanzania	Human	No	Stool	Beta-lactam: blaEC-13	No
KTE91	2009	2480/88	SAMN00854646	not available	Denmark	Human	No	Feces	Beta-lactam: blaEC-13	No
AF84	2009	2480/88	SAMN05729284	not available	Israel	Environmental	No	Cowshed	Beta-lactam: blaEC-13	No
KTE184	2009	2480/88	SAMN00974039	not available	Missing data	Human	Yes	Urine	Beta-lactam: blaEC-13	No
KTE90	2009	2480/88	SAMN00847685	not available	Missing data	Human	No	Feces	Beta-lactam: blaEC-13	No
blood-10-0038	2010	2480/88	SAMN02801864	25373147	United States	Human	Yes	Blood	Aminoglycoside: aph(3'')-Ib, aph(6)-Id; Beta-lactam: blaEC-13; Sulphonamide: sul2; Tetracycline: tet(B)	Yes
blood-10-0040	2010	2480/88	SAMN02801865	25373147	United States	Human	Yes	Blood	Aminoglycoside: aph(3'')-Ib, aph(6)-Id; Beta-lactam: blaEC-13; Sulphonamide: sul2; Tetracycline: tet(B)	Yes
blood-10-0065	2010	2480/88	SAMN02801866	25373147	United States	Human	Yes	Blood	Aminoglycoside: aph(3'')-Ib, aph(6)-Id; Beta-lactam: blaEC-13; Sulphonamide: sul2; Tetracycline: tet(B)	Yes
Ecol_224	2010	101/88	SAMN05511177	not available	Vietnam	Human	Missing data	Missing data	Aminoglycoside: aac(6')-Ib-cr, aadA16; Beta-lactam: blaEC-13, blaCTX-M-14, blaCTX-M-15, blaKPC-2, blaTEM-116; Phenicol: catA1; Sulphonamide: sul1, Tetracycline: tet(B); Trimethoprime: dfrA27; Others: arr-3, QacE delta 1.	Yes
MOD1-EC6068	2010	101/88	SAMN05439493	not available	United States	Retail food	No	Spinach	Beta-lactam: blaEC-13, blaTEM-1	No
blood-2011-0238	2011	2480/88	SAMN02801899	25373147	United States	Human	Yes	Blood	Aminoglicoside: aph(3'')-Ib, aph(3')-Ia, aph(6)-Id; Beta-lactam: blaCMY-2, blaEC-13, blaTEM-1; Phenicol: floR; Sulphonamide: sul2; Tetracycline: tet(A)	Yes
blood-2011-0240	2011	101/88	SAMN02801900	25373147	United States	Human	Yes	Blood	Amynoglycoside: aph(3'')-Ib, aph(3')-Ia, aph(6)-Id; Beta-lactam: blaEC-13, blaCMY-2, blaTEM-1; Phenicol: floR; Sulphonamide: sul2; Tetracycline: tet(A)	Yes
upec-130	2011	101/88	SAMN02801943	25373147	United States	Human	Yes	Urine	Beta-lactam: blaEC-13	No
21_Esco_HA-NL	2012	101/88	SAMN05977342	29051750	Netherlands	Human	No	Retal swab	Aminoglycoside: aadA1, sat2; Beta-lactam: blaEC-13, blaCTX-M-14; Tetracycline: tet(A); Trimethoprim: dfrA1.	Yes
50673720	2012	101/88	SAMN04158305	29141051	Norway	Human	No	Retal swab	Aminoglycoside: aac(3)-IIa, aac(6')-Ib-cr; Beta-lactam: blaEC-13, blaCTX-M-15, blaOXA-1, blaNDM-7; Phenicol: catA1, catB3; Tetracycline: tet(B) Others: bleO.	Yes
sc12-100	2012	101/88	SAMN07983304	29535301	China	Chicken	No	Cloaca swab	Aminogycoside: aac(3)-IId, aph(3'')-Ib, aph(6)-Id; Beta-lactam: blaEC-13, blaTEM-1; Colistin: mcr-1; MLS: mph(A); Phenicol: catA2, floR; Sulphonamide: Sul2, Trimethoprim: dfrA14	Yes
310190	2012	2480/88	SAMN08161151	not available	Mozambique	Human	Yes	Stool/diarrhea	Aminoglycoside: aph(3'')-Ib, aph(6)-Id; Beta-lactam: blaEC-13, blaTEM-1; Sulphonamide: sul1, sul2; Tetracycline: tet(A); Trimethoprime: dfrA7; Others: qacE delta 1	Yes
ECO3347	2012	359/88	SAMN07556805	not available	China	Human	Yes	Urine	Beta-lactam: blaEC-13; Phenicol: floR; Sulphonamide: sul2	No
STEC 2359	2013	101/88	SAMN04002673	27058887	Netherlands	Human	Yes	Stool	Aminoglycoside: aph(3'')Ib, aph(6)-Id; Beta-lactam: blaEC-13, blaTEM-1; Sulphonamide: sul2; Tetracycline: tet(A).	Yes	stx1a producer (STEC)
IHIT22432	2013	359/88	SAMN05285364	not available	Germany	Cat	Yes	Urine	Aminoglycoside: aadA1, aadA5; Beta-lactam: blaEC-13, blaCTX-M-36, blaTEM-1; Colistin: mcr-1.1; MLS: lnu(F); Sulphonamide: sul1; Trimethoprime: dfrA1, dfrA17; Others: qacE delta 1	Yes
Win2013_WWKa_NEU_60	2013	2480/88	SAMN06641926	not available	Germany	Environmental	No	Wastewater inflow	Beta-lactam: blaEC-13, blaTEM-1; Sulphonamide: sul2; Tetracycline: tet(A)	Yes
FDAARGOS_437	2014	2480/88	SAMN07312481	not available	Canada	Human	Yes	Urine	Aminoglycoside: aac(3)-IIa, aac(6')-Ib-cr5, aph(3'')-Ib, aph(6)-Id; Beta-lactam: blaEC-13, blaCTX-M-15, blaNDM-1, blaOXA-1, blaOXA-2, blaTEM-1; MLS: mph(A); Phenicol: catA1, catB3; Sulphonamide: sul1; Tetracycline: tet(A); Trimethoprime: dfr7; Others: bleO, rmtB1, qacEdelta1	Yes
19	2014	2480/88	SAMN07594060	not available	Ecuador	Dog	No	Stool	Aminoglycoside: aadA2, Beta-lactam: blaEC-13, blaTEM-1; MLS: mef(B); Sulphonamide: sul3; Tetracycline: tet(A), tet(M); Trimethoprime: dfrA12; Others: bleO	Yes
587	2014	101/88	SAMN05928847	not available	China	Chicken	No	Cloaca swab	Aminoglycoside: aac(3)-IV, aadA2, aph(3'')-Ib, aph(3')-Ia, aph(4)-Ia, aph(6)-Id; Beta-lactam: blaCMY-2, blaEC, blaNDM-5, blaTEM-1; Fosfomycin: fosA3; MLS: erm(B), mph(A); Phenicol: catA1, floR; Sulphonamide: sul1, sul2; Tetracycline: tet(A); Trimethoprime: dfrA12, dfrA14; Others: ble, qacEdelta1, rmtB1,	Yes
VREC0285	2014	2480/88	SAMEA3472105	not available	United Kingdom	Pig	No	Feces	Aminoglycoside: aadA1, aph(3'')-Ib, aph(6)-Id; Beta-lactam: blaEC-13, blaTEM-1; Sulphonamide: sul1, sul2; Tetracycline: tet(A); Trimethoprime: drfA1; Others: qacE deta 1	Yes
448	2014	6388/88	SAMN05928852	not available	China	Chicken	No	Cloaca swab	Aminoglycoside: aac(3)-IId, aadA2, aph(3'')-Ib, aph(3')-Ia, aph(6)-Id; Beta-lactam: blaEC-13, blaCMY-2, blaCTX-M-55, blaNDM-9, blaTEM-1; Fosfomycin: fosA3; MLS: mph(a); Phenicol: floR; Sulphonamide: sul1, sul2; Tetracycline: tet(A); Trimethoprime: dfrA12; Others: bleO, oqxA, oqxB, qacE	Yes
015PP2015	2015	101/88	SAMN04880562	not available	Poland	Chicken	Yes	Not informed	Beta-lactam: blaEC-13	No
GER_MD01_1505_Eco_047	2015	101/88	SAMN08519250	30365516	Germany	Dog	No	Feces	Aminoglycoside: aac(6')-Ib-cr5, aph(3'')-Ib, aph(6)-Id; Beta-lactam: blaEC-13, blaCTX-M-15, blaOXA-1; Phenicol: catB3; Tetracycline: tet(A).	Yes
GER_MD03_1505_Eco_006	2015	101/88	SAMN08519214	30365516	Germany	Dog	No	Feces	Aminoglycoside: aadA5; Beta-lactam: blaEC-13; blaCTX-M-1; Sulphonamide: sul2; Trimethoprim: dfrA17.	Yes
PN25	2015	2480/88	SAMN10394867	30455105	Thailand	Chicken	No	Feces	Beta-lactam: blaEC-13, blaCTX-M-14; Colistin: mcr-1; Tetracycline: tet(B)	Yes
CoR-4	2015	101/88	SAMN07211057	not available	China	Human	Yes	Urine	Beta-lactam: blaEC-13	No
165	2015	101/88	SAMN04393397	not available	United States	Human	Yes	Abdominal Fluid	Aminoglycoside: AAC(3)-IId, AAC(6')-Ib-cr, AadA16, APH(3'')-Ib, APH(3')-Ia, APH(6)-Id; Beta-lactam: blaEC-13, blaTEM-1, blaNDM-5; MLS: mph(A); Phenicol: CatA1, floR; Sulphonamide: Sul1, sul2; Tetracycline: tet(A); Trimethoprime: DfrA14, DfrA27; Others: arr-3, bleO, RmtB1, QacE delta 1	Yes
BWH68	2015	2480/88	SAMN04521875	not available	United States	Human	Yes	Abdominal Fluid	Aminoglycoside: aac(3)II, aac(6')-Ib-cr5, aadA16, aph(3')-Ia, aph(3'')-Ib, aph(6)-Id; Beta-lactam: blaEC-13, blaNDM-5, blaTEM-1; MLS: mph(A); Phenicol: floR; Sulphonamide: sul1, sul2; Tetracycline: tet(A); Trimethoprime: dfrA, dfrA14; Others: arr-3, bleO, rmtB1, qacEdelta1	Yes
460	2015	101/88	SAMN05928870	not available	China	Chicken	No	Cloaca swab	Aminoglycoside: acc(3)-IId, acc(6')-Ib-cr, aadA16, aadA22, aph(3')-Ia, aph(3'')-Ib, aph(6)-Id; Beta-lactam: blaEC-13, blaCMY-2, blaCTX-M-55, blaNDM-9, blaTEM-1; Fosfomycin: fosA3; MLS: erm(B), mph(A); Phenicol: catB3, floR; Sulphonamide: sul1, sul2; Tetracycline: tet(A), tet(M); Trimethoprime: dfrA14, dfrA27; Others: arr-3, bleO, rmtB1, qacE delta 1	Yes
578	2015	101/88	SAMN05928887	not available	China	Chicken	No	Cloaca swab	Aminoglycoside: aadA2, aph(3'')-Ib, aph(6)-Id; Beta-lactam: blaEC-13, blaCMY-2, blaNDM-5, blaTEM-1; Fosfomycin: fosA3; MLS: erm(B), mph(A); Phenicol: catA1, floR; Sulphonamide: sul1, sul2; Tetracycline: tet(A); Trimethoprime: dfrA14; Others: bleO, rmtB1, qacE delta 1	Yes
513	2015	101/88	SAMN05929003	not available	China	Swallow	No	Faeces swab	Aminoglycoside: aadA22, aph(3')-Ia, aph(3'')-Ib, aph(6)-Id; Beta-lactam: blaEC-13, blaCMY-2, blaNDM-5, blaTEM-1; MLS: erm(B), erm(T), eph(A); Phenicol: catA1, floR; Sulphonamide: sul2; Tetracycline: tet(A); Trimethoprime: dfrA14; Others: bleO, rmtB1	Yes
VREC0533	2015	101/88	SAMEA3753095	not available	United Kingdom	Chicken	No	Feces	Beta-lactam: blaEC-13	No
PN29	2015	101/88	SAMN10394869	not available	Thailand	Poultry	No	Feces	Aminoglycosinde: aadA1, aadA2; Beta-lactam: blaEC-13, blaCTX-M-55; Colistin: mcr-1; MLS: mef(B); Phenicol: cmlA1; Sulphonamide: sul3; Tetracycline: tet(A); Trimethoprime: dfrA12.	Yes
O177:H21	2015	359/88	SAMN05407982	not available	Netherlands	Human	No	Feces	Aminoglycoside: aadA5, aph(3')-Ia, aph(3'')-Ib, aph(6)-Id; Beta-lactam: blaEC-13, blaCMY-2, blaTEM-1; Colistin: mcr-1; Phenicol: catA1; Sulphonamide: sul1, sul2; Tetracycline: tet(B); Trimethoprime: dfrA17; Others: qacE delta 1	Yes
449	2015	101/88	SAMN04009886	not available	Tanzania	Cow	Missing data	Missing data	Beta-lactam: blaEC-13	No	stx1a producer (STEC)
VRES0678	2015	5957/88	SAMEA3485108	not available	United Kingdom	Chicken	No	Meat	Aminoglycoside: aadA5; Beta-lactam: blaEC-13; blaCTX-M-1; Sulphonamide: sul2; Trimethoprim: dfrA17.	Yes
496	2015	6388/88	SAMN05928961	not available	China	Fly	No	Fly	Aminoglycoside: aac(3')-IV, aac(6')-Ib, aac(6')-Ib-cr, aadA2, aph(3')-I, aph(3'')-Ib, aph(4)-Ia, aph(6)-Id, estX; Beta-lactam: blaEC-13, blaCTX-M-55, blaNDM-5, blaOXA-1, blaTEM-1; Colistin: mcr-1, Fosfomycin: fosA3; MLS: mph(A); Phenicol: catB3, floR; Sulphonamide: sul1, sul2; Tetracycline: tet(A); Trimethoprime: dfrA12; Others: armA, arr-3, bleO, oqxA, oqxB, qacE delta 1	Yes
ICBEC72H	2016	101/88	SAMN05172242	27503650	Brazil	Human	Yes	Foot secretion	Beta-lactam: blaEC-13, blaCTX-M-8; Colistin: mcr-1; mcr-1.1	Yes
SC141	2016	101/88	SAMN08446281	30423047	China	Environmental	No	Bus	Aminoglycoside: aadA1, aadA2, aph(3'')-Ib, aph(6)-Id; Beta-lactam: blaEC-13, blaCTX-M-55, blaTEM-1; Colistin: mcr-1.1; Flouroquinolone: qnrS1; Fosfomycin: fosA3; MLS: mef(B); Phenicol: cmlA1, floR; Sulphonodime: sul2, sul3; Tetracycline: tet(A), Trimethoprim: dfrA12; Others: bleO, oqxA, oqxB, qacL.	Yes
BA13969	2016	2480/88	SAMN08637785	not available	India	Human	Yes	Blood	Beta-lactam: blaEC-13, blaNDM-7, blaSFO-1, blaTEM-1; MLS: mph(A); Tetracycline: tet(B); Others: bleO, rmtB1	Yes
A215	2016	101/88	SAMN07556483	not available	China	Human	No	Feces	Aminoglycoside: aadA1, aadA2, aph(6)-Id; Beta-lactam: blaEC-13; Colistin: mcr-1.1; Phenicol: cmlA1, floR; Sulphonamide: sul3; Tetracycline: tet(A);Trimethoprime: dfrA12; Others: bleO, oqxA, oqxB, qacL	Yes
GMR-RA-381.16	2016	101/88	SAMN05792032	not available	Colombia	Human	Yes	Urine	Beta-lactam: blaEC-13, blaTEM-1; Colistin: mcr-1; Flouroquinolone: qnrB19; Tetracycline: tet(A)	Yes
GMR-RA-432.16	2016	2480/88	SAMN05792034	not available	Colombia	Human	Yes	Urine	Beta-lactam: blaEC-13, blaTEM-1; Colistin: mcr-1; Flouroquinolone: qnrB19; Tetracycline: tet(A)	Yes
4222	2016	2480/88	SAMN08108613	not available	Argentina	Human	Yes	Urine	Amynoglycoside: aadA1, ant(2'')-Ia; Beta-lactam: blaEC-13, blaCTX-M-2; Colistin: mcr1.1; Phenicol: CatA1; Sulphonamide: sul1; Tetracycline: tet(A); Trimethoprime: dfrA1; Others: qacE delta 1	Yes
WCHEC5	2016	NA/88	SAMN06909174	not available	China	Human	Missing data	Missing data	Aminoglycoside: aac(3)-IId, aadA2, aph(3'')-Ib, aph(3')-Ia, aph(6)-Id; Beta-lactam: blaEC-13, blaNDM-5, blaTEM-1; Flouroquinolone: qepA1; MLS: mph(A); Sulphonamide: sul2; Tetracycline: tet(A); Trimethoprime: dfrA12; Others: bleO, oqxA, oqxB, qacE delta 1, rmtB1	Yes
YH17156	2016	NA/88	SAMN08534281	not available	China	Chicken	Missing data	Missing data	Aminoglycoside: aac(6')-Il, aadA2, aph(3'')-Ib, aph(3')-IIa, aph(6)-Id; Beta-lactam: blaEC-13 blaCTX-M-123; Colistin: mcr-1.1; Fosfomycin: fosA3; MLS: mph(A); Phenicol: floR; Sulphonamide: sul1, sul2; Tetracycline: tet(A); Trimethoprime: dfrA12; Others: oqxA, oqxB, qacEdelta1	Yes
H8Ecoli	2016	101/88	SAMN08932126	not available	China	Human	No	Feces	Aminoglicoside: aac(3)-IV, aadA1, aadA2, aph(3')-Ia, aph(4)-Ia, estX; Beta-lactam: blaEC-13, blaCTX-M-14; Colistin: mcr-1; Fosfomycin: fosA3; Phenicol: cmlA1, floR; Sulphonamide: sul1, sul2, sul3; Tetracycline: tet(A); Trimethoprime: dfrA12; Others: bleO, oqxA2, oqxB2, qacL.	Yes
B146	2016	101/88	SAMN07556479	not available	China	Human	No	Feces	Aminoglycoside: aadA1, aadA2, aph(3')-Ia; Beta-lactam: blaEC-13; Colistin: mcr-1; Flouroquinolone: qnrS1; MLS: mef(B); Phenicol: cmlA1; Sulphonadime: sul3; Tetracycline: tet(A); Trimethoprim: dfrA12; Others: qacL.	Yes
A219	2016	101/88	SAMN07556481	not available	China	Human	No	Feces	Aminoglycoside: aadA1, aadA2; aph(3')-Ia; Beta-lactam: blaEC-13; Colistin: mcr-1; Flouroquinolone: qnrS1; MLS: mef(B); Phenicol: cmlA1; Sulphonamide: sul3; Tetracycline: tet(A); Trimethoprim: dfrA12; Others: bleO, oqxA, oqxB, QacL.	Yes
JL18	2016	101/88	SAMN08148381	not available	China	Human	No	Feces	Aminoglicoside: acc(3)-IIa, aadA5, aph(3'')-Ib, aph(6)-Id; Beta-lactam: blaEC-13, blaTEM-1; Colistin: mcr-1; MLS: mph(A); Phenicol: floR, Sulphonamide: sul1, sul2; Tetracycline: tet(A); Trimethoprime: dfrA17; Others: bleO, oqxAB, qacE delta 1.,	Yes
A96	2016	2480/88	SAMN07556478	not available	China	Human	No	Feces	Aminoglycoside: aadA1, aadA2; Beta-lactam: blaEC-13, blaTEM-1; Colistin: mcr1.1; Flouroquinolone: qnrS1; MLS: mef(B); Phenicol: cmlA1; Sulphonamide: sul3; Tetracucline: tet(A); Trimethoprime: dfrA12; Others: qacL	Yes
A371	2016	2480/88	SAMN07556480	not available	China	Human	No	Feces	Aminoglycoside: aadA1, aadA2, aph(3'')-Ib, aph(3')-Ia, aph(6)-Id; Beta-lactam: blaCTX-M-55, blaEC-13, blaTEM-141; Colistin: mcr1.1; Flouroquinolone: qnrS1; Fosfomycin: fosA3; MLS: cfr, erm(B), mef(B), mph(A); Phenicol: cmlA1, floR; Sulphonamide: sul2, sul3; Tetracycline: tet(A); Trimethoprime: dfrA12; Others: bleO, oqxA, oqxB, qacL	Yes
A2	2016	101/88	SAMN07556482	not available	China	Human	No	Feces	Aminoglycoside: aac(3)-IId, aadA1, aadA5; Beta-lactam: blaEC-13, blaTEM-1; Colistin: mcr-1.1; Phenicol: floR; Sulphonamide: sul1, sul2; Tetracycline: tet(A); Trimethoprime: dfrA17; Others: bleO, oqxA, oqxB, qacEdelta1.	Yes
A412	2016	101/88	SAMN07556476	not available	China	Human	No	Feces	Aminoglycoside: aph(3')-Ia; Beta-lactam: blaEC-13, blaCTX-M-14; Colistin: mcr-1.1; Fosfomycin: fosA3; Sulphonamide: sul1; Tetracycline: tet(A); Others: bleO,oqxA2, oqxB2, qacE.	Yes
A413	2016	101/88	SAMN07556477	not available	China	Human	No	Feces	Aminoglycoside: aph(3')-Ia; Beta-lactam: blaEC-13, blaCTX-M-14; Colistin: mcr-1.1; Fosfomycin: fosA3; Sulphonamide: sul1; Tetracycline: tet(A); Others: bleO,oqxA2, oqxB2, qacE.	Yes
GBGD20	2016	2480/88	SAMN10476546	not available	China	Human	Missing data	Gut	Aminoglycoside: aadA1, aadA2, aph(3'')-Ib, aph(3')-Ia, aph(6)-Id; Beta-lactam: blaEC-13 blaCTX-M-55, blaTEM; Colistin: mcr-1.1; Fosfomycin: fosA3; Flouroquinolone: qnrS1; MLS: mef(B); Phenicol: cmlA1, floR, Sulphonamide: sul2, sul3, Tetracycline: tet(A); Trimethoprime: dfrA12; Others: bleO, oqxA, oqxB, qacL.	Yes
A114	2016	2480/88	SAMN07556485	not available	China	Human	No	Feces	Beta-lactam: blaEC-13; Colistin: mcr1.1; Flouroquinolone: qnrS1; Tetracycline: tet(A); Others: bleO, oqxA, oqxB	Yes
A118	2016	2480/88	SAMN07556484	not available	China	Human	No	Feces	Beta-lactam: blaEC-13; Colistin: mcr1.1; Flouroquinolone: qnrS1; Tetracycline: tet(A); Others: bleO, oqxA, oqxB	Yes
200H	2017	NA/88	SAMN09225594	not available	Brazil	Human	Yes	Urine	Aminoglycoside: aac(6')-Ib-cr5, aph(3'')-Ib, aph(3')-IIa, aph(6)-Id, estX, sat2; Beta-lactam: blaEC-13, blaOXA-9, blaTEM-1; Colistin: mcr-1; Tetracycline: tet(B); Others: bleO	Yes
WCHEC68 / SCEC020068	2017	2480/88	SAMN06909183	not available	China	Human	Yes	Missing data	Aminoglyscoside: aac(3)-IV, aadA1, aadA2, aph(3'')-Ib, aph(3')-Ia, aph(4)-Ia, aph(6)-Id; Beta-lactam: blaCTX-M-14, blaCTX-M-55, blaEC-13, blaNDM-5; Colistin: mcr-1.1; Fosfomycin: fosA3; MLS: mph(A); Phenicol: catA1, cmlA1, floR;Sulphonamide: sul2, sul3; Tetracycline: tet(A), tet(M); Trimethoprime: dfrA14; Others: bleO, qacL	Yes
102B6	2017	101/88	SAMN10644672	not available	France	Human	Missing data	Missing data	Aminoglycoside: aadA1; Beta-lactam: blaEC-13, blaOXA-48, blaTEM-1; Sulphonamide: sul2; Trimethoprime: dfrA1; Others: oqxB17	Yes
SCEC88	2017	6388/88	SAMN07602137	not available	China	Human	Missing data	Missing data	Aminoglycoside: aac(3)-IV, aadA2, aadA5, aph(3'')-Ib, aph(3')-Ia, aph(4)-Ia; Beta-lactam: blaEC-13, blaCTX-M55, blaNDM-5, blaTEM-1; Fosfomycin: fosA3; Phenicol: catA1, floR; Sulphonamide: sul1, sul2; Tetracycline: tet(A); Trimethoprime: dfrA12, dfrA17; Others: bleO oqxA2, oqxB, qacE delta 1	Yes
CVM N17EC0684	2017	101/88	SAMN10221287	not available	United States	Retail food	No	Chicken Thighs	Aminoglycoside: aph(3'')-Ib, aph(6)-Id; Beta-lactam: blaEC-13; Tetraciclyne: tet(A).	Yes
CVM N17EC1284	2017	101/88	SAMN10221582	not available	United States	Retail food	No	Ground turkey	Beta-lactam: blaEC-13	No
CFFY132	2017	NA/88	SAMN10187518	not available	China	Retail food	No	Chicken droppings	Aminoglycoside: aadA1, aph(3')-Ia, aph(3'')-Ib, aph(6)-Id, estX; Beta-lactam: blaEC-13, blaCTX-M-15, blaTEM-1; Fosfomycin: fosA3; Phenicol: cmlA1, floR; Sulphonamide: sul2, sul3; Tetracycline: tet(A); Trimethoprime: dfrA12; Others: qacL	Yes
CHL5009T	2017	101/88	SAMN10225034	not available	New Zealand	Human	Yes	Urine	Aminoglycoside: aac(3)-IId, aadA1, aadA2; Beta-lactam: blaEC-13, blaCTX-M-55, blaTEM-1; Colistin: mcr-1.1, mcr-3.1; Fouroquinolone: qnrS1; MSL: mef(B); Phenicol: catA2, cmlA1; Sulphonamide: sul3; Tetracycline: tet(A), tet(M); Trimethoprime: dfrA12; Others: qacL.	Yes
C21	2018	101/88	SAMN10390753	not available	Kenya	Camel	No	Missing data	Beta-lactam: blaEC-13	No	stx1a producer (STEC)
MS 107-1	Not Informed	2480/88	SAMN00189162	not available	United States	Human	Missing data	Affected ileum / Crohn' disease	Aminoglycoside: AadA22, AAC(3)-II; Beta-lactam: blaEC-13, blaTEM-1; MLS: mph(A); Phenicol: CatA1; Sulphonamide: sul1; Trimethoprime: DfrA14; Others: QacE delta 1	Yes
MS 79-10	Not Informed	2480/88	SAMN00189186	not available	United States	Human	Missing data	Normal ileum / Crohn' disease	Aminoglycoside: AadA22, AAC(3)-II; Beta-lactam: blaEC-13, blaTEM-1; MLS: mph(A); Phenicol: CatA1; Sulphonamide: sul1; Trimethoprime: DfrA14; Others: QacE delta 1	Yes
UMB1180	Not Informed	101/88	SAMN09665180	not available	United States	Human	Yes	Urine	Beta-lactam: blaEC-13	No
606	Not Informed	NA/88	SAMN02471485	not available	Not Informed	Human	Yes	Pulmonary	Aminoglycoside: aadA1, aadA2, aadA5; Beta-lactam: blaEC-13, blaTEM-1; Phenicol: catA1, cmlA1; Sulphonamide: sul1, sul3; Tetracycline: tet(A); Trimethoprime: dfrA17; Others: qacEdelta1, qacL	Yes
PNUSAE018563	Not informed	101/88	SAMN10349236	not available	United States	Not Informed	Missing data	Missing data	Beta-lactam: blaEC-13; Tetracycline: tet(A)	No	stx1a producer (STEC)
PNUSAE019530	Not informed	101/88	SAMN10349029	not available	United States	Not Informed	Missing data	Missing data	Beta-lactam: blaEC-13	No	stx1a producer (STEC)
PNUSAE019826	Not informed	101/88	SAMN10366696	not available	United States	Not Informed	Missing data	Missing data	Aminoglycoside: aac(3)-VIa, aadA1, aph(3'')-Ib, aph(6)-Id; Beta-lactam: blaEC-13, blaCMY-2; Sulphonamide: sul1, sul2; Tetracycline: tet(A); Others: qacE delta 1	Yes	stx1a producer (STEC)
AR_0048	Not Informed	2480/88	SAMN04014889	not available	Not Informed	Not Informed	Clinical	Not Informed	Aminoglycoside: aac(6')-II, aadA2, aph(3')-Ia, aph(3'')-Ib, aph(6)-Id; Beta-lactam: blaEC-13, blaCMY-6, blaCTX-M-15, blaNDM-1, blaOXA-2, blaTEM-1; Phenicol: catA1; Sulphonamide: sul1; Tetracycline: tet(B); Trimethoprime: dfr7, dfrA12; Others: bleO, rmtC, qacE delta 1	Yes	FDA-CDC Antimicrobial Resistance Bank
AR_0118	Not Informed	101/88	SAMN04014959	not available	Not Informed	Not Informed	Clinical	Not Informed	Amynoglycoside: aac(3)-IIa, aac(6')-Ib, aph(3'')-Ib, aph(6)-Id; Beta-lactam: blaEC-13, blaCMY-6, blaNDM-1, blaOXA-2, blaTEM-1; Phenicol: catA1; Sulphonamide: sul1; Trimethoprime: dfr7; Others: bleO, rmtC, qacE delta 1	Yes	FDA-CDC Antimicrobial Resistance Bank
AR_0149	Not Informed	101/88	SAMN04014960	not available	Not Informed	Not Informed	Clinical	Not Informed	Aminoglycoside: aac(3)-IIa, aac(6')-Ib, aac(6')-Ib-cr5, aac(6')-Ib11, aadA1, aph(3'')-Ib, aph(6)-Id; Beta-lactam: blaEC-13, blaCMY-6, blaCTX-M-15, blaNDM-1, blaOXA-1, blaOXA-2, blaOXA-9, blaTEM-1; Phenicol: catA1; Sulphonamide: sul1; Trimethoprime: dfr7; Others: bleO, rmtC, qacEdelta1	Yes	FDA-CDC Antimicrobial Resistance Bank
