# Supplementary material for: Virulence Potential of a Multidrug-Resistant Escherichia coli Strain Belonging to the Emerging Clonal Group ST101-B1 Isolated from Bloodstream Infection
Source: Microorganisms. 2020 May 30;8(6):827. doi: 10.3390/microorganisms8060827 (PMC7355805; doi:10.3390/microorganisms8060827)
Supplement: Supplementary file 1 [file microorganisms-08-00827-s001.zip › Suppl/Table S4 Virulence details.xlsx]

## Sheet: Completed
	Patric					NCBI protein-protein BLAST				swiss-prot
Traits	virulence factor	cluster/operon	Gene	NA Length	AA Length	e-value	cover	identity	reference	protein	e-value	identity	reference	Variant homology/observation
Adhesin	Minor curlin subunit CsgB, nucleation component of curlin monomers	csgBAC	csgB	456	151	4e-102	1	1	WP_000791650.1	CsgB	5e-99	1	P0ABK7	The expression of curli requires both operon csgCAB and csgDEFG functional (Brombacher et al 2006)
Adhesin	Major curlin subunit precursor CsgA	csgBAC	csgA	456	151	4e-101	1	1	WP_000771437.1	CsgA	9.8e-106	1	P28307
Adhesin	Putative curli production protein CsgC	csgBAC	csgC	333	110	6e-72	1	1	WP_000992834.1	CsgC	4.4e-69	98.2%	P52107
Adhesin	Transcriptional regulator CsgD for 2nd curli operon	csgDEFG	csgD	651	216	3e-158	1	1	WP_000481500.1	CsgD	1.6e-152	99.1%	P52106
Adhesin	Curli production assembly/transport component CsgE	csgDEFG	csgE	390	129	2e-90	1	1	WP_000833288.1	CsgE	1.1e-89	1	P0AE95
Adhesin	Curli production assembly/transport component CsgF	csgDEFG	csgF	417	138	2e-95	1	1	WP_001264088.1	CsgF	2.5e-95	1	P0AE98
Adhesin	Curli production assembly/transport component CsgG	csgDEFG	csgG	834	277	0.0	1	1	WP_001189312.1	CsgG	0.0	99.6%	P0AEA2
Adhesin	intimin-like adhesin FdeC	eaeH	eaeH	4254	1417	0.0	1	1	WP_000092619.1	-	-	-	-
Adhesin	Transcriptional regulator EcpR	ecpRABCDE	ecpR	543	180	1e-128	1	1	WP_000220237.1	EcpR	9.9e-126	1	B7L425
Adhesin	Common pilus major fimbrillin subunit EcpA	ecpRABCDE	ecpA	588	195	3e-134	1	1	WP_000730972.1	EcpA	1e-133	1	P0AAA4
Adhesin	Probable fimbrial chaperone EcpB	ecpRABCDE	ecpB	669	222	4e-163	1	1	WP_000716398.1	EcpB	2.7e-156	1	B7L423
Adhesin	Probable outer membrane usher protein EcpC	ecpRABCDE	ecpC	2526	841	0.0	1	1	WP_001131079.1	EcpC	0.0	99.6%	P77802
Adhesin	Fimbria adhesin EcpD	ecpRABCDE	ecpD	1644	547	0.0	1	1	WP_001315269.1	EcpD	0.0	99.3%	P77694
Adhesin	Probable fimbrial chaperone EcpE	ecpRABCDE	ecpE	711	236	2e-175	1	1	WP_001305432.1	EcpE	5.2e-170	99.2%	P77263
Adhesin	Laminin-binding fimbrial subunit ElfA	elfADCG-ycbUVF	elfA	543	180	1e-123	1	1	WP_000750284.1	ElfA	1.5e-100	84.4%	Q8X582
Adhesin	Probable fimbrial chaperone protein ElfD	elfADCG-ycbUVF	elfD	702	233	3e-170	0.99	1	WP_000845152.1	ElfD	1e-164	98.7%	Q8X5E4
Adhesin	Probable outer membrane usher protein ElfC	elfADCG-ycbUVF	elfC	2601	866	0.0	0.99	1	WP_000286318.1	ElfC	0.0	98.3%	Q8XDD1
Adhesin	Uncharacterized fimbrial-like protein ElfG	elfADCG-ycbUVF	elfG	1071	356	0.0	0.99	1	WP_001165658.1	ElfG	0.0	99.1%	Q8XDC9
Adhesin	Uncharacterized fimbrial-like protein YcbU	elfADCG-ycbUVF	ycbU	543	180	1e-127	1	1	WP_000730614.1	YcbU	1.3e-124	1	P75859
Adhesin	Uncharacterized fimbrial-like protein YcbV	elfADCG-ycbUVF	ycbV	564	187	2e-135	1	1	WP_001254327.1	YcbV	3.1e-116	98.8%	P75860
Adhesin	Uncharacterized fimbrial chaperone YcbF	elfADCG-ycbUVF	ycbF	690	229	2e-163	1	0.99	WP_001307090.1	YcbF	2.2e-160	98.3%	P40876
Adhesin	Type 1 fimbriae regulatory protein FimB	fimEBAICDFGH	fimB	603	200	2e-147	1	1	WP_000790583.1	FimB	3.4e-148	1	P0ADH5
Adhesin	Type 1 fimbriae regulatory protein FimE	fimEBAICDFGH	fimE	597	198	3e-144	1	1	WP_000044711.1	FimE	6.4e-143	1	P0ADH7
Adhesin	Type-1 fimbrial protein, A chain	fimEBAICDFGH	fimA	549	182	9e-124	1	1	WP_000695535.1	FimA	8.1e-111	92.9%	P04128
Adhesin	Fimbrin-like protein FimI	fimEBAICDFGH	fimI	498	165	2e-119	1	1	WP_000824092.1	FimI	2.9e-117	99.4%	P39264
Adhesin	Chaperone protein FimC	fimEBAICDFGH	fimC	726	241	1e-176	1	1	WP_000066557.1	FimC	2.1e-167	99.2%	P31697
Adhesin	Outer membrane usher protein FimD	fimEBAICDFGH	fimD	2637	878	0.0	1	1	WP_000121018.1	FimD	0.0	99.1%	P30130
Adhesin	Protein FimF (regulates length and adhesion of type 1 fimbriae)	fimEBAICDFGH	fimF	531	176	1e-125	1	1	WP_001244827.1	FimF	1.3e-122	1	P08189
Adhesin	Protein FimG (regulates length and adhesion of type 1 fimbriae)	fimEBAICDFGH	fimG	504	167	3e-117	1	1	WP_000870592.1	FimG	6.7e-114	1	P08190
Adhesin	Protein FimH (regulates length and adhesion of type 1 fimbriae, and mediates mannose binding)	fimEBAICDFGH	fimH	903	300	0.0	1	0.99	WP_000832227.1	FimH	0.0	99.3%	P08191
Adhesin	Type IV pilin PilA / HcpA	hcpABC	hcpA	441	146	1e-104	1	1	WP_000360895.1	PpdD	7.3e-101	99.3%	P36647
Adhesin	Type IV fimbrial assembly, ATPase PilB/ HcpB	hcpABC	hcpB	1386	461	0.0	1	1	WP_001025174.1	HofB	0.0	98.9%	P36645
Adhesin	Type IV fimbrial assembly protein PilC/ HcpC	hcpABC	hcpC	1203	400	0.0	1	1	WP_000157236.1	HofC	0.0	98.3%	P36646
Adhesin	Long polar fimbria protein A	lpfABCDE	lpfA	525	174	1e-119	1	1	WP_000756356.1	LpfA	1.3e-83	73.4%	Q8X5K5
Adhesin	Chaperone protein LpfB	lpfABCDE	lpfB	687	228	3e-166	1	1	WP_000822476.1	LpfB	1.5e-104	69.9%	P43661
Adhesin	Outer membrane usher protein LpfC	lpfABCDE	lpfC	2532	843	0.0	1	1	WP_000558680.1	LpfC	0.0	73.2%	P43662
Adhesin	Protein LpfD	lpfABCDE	lpfD	1056	351	0.0	1	1	WP_000694926.1	LpfD	3.7e-87	44.9%	P43663
Adhesin	Protein LpfE	lpfABCDE	lpfE	525	174	7e-124	1	1	WP_000831422.1	LpfE	5e-57	52.9%	P43664
Adhesin	Outer membrane protein PagN	pagN	pagN	729	242	2e-174	1	1	WP_000723272.1	PagN	7.3e-49	40.4%	Q8ZRJ9	Salmonella adhesin that is regulated by phoPQ two component system
Adhesin	PixB protein	pixBAHCDJFG	pixB							-	-	-	-
Adhesin	PixA protein	pixBAHCDJFG	pixA	507	168	8e-117	1	0.99	CAC85333.1	PapA	1.3e-45	0.47	P04127
Adhesin	PixH protein	pixBAHCDJFG	pixH	588	195	1e-142	1	1	WP_000946201.1	Prs	1.7e-86	62.1%	P42185
Adhesin	fimbrial usher protein PixC	pixBAHCDJFG	pixC	2511	836	0.0	1	1	CAE85159.1	PapC	0.0	71.6%	P07110
Adhesin	fimbrial chaperone PixD	pixBAHCDJFG	pixD	732	243	2e-179	1	1	WP_001171049.1	PapD	5.8e-133	77.9%	P15319
Adhesin	PixJ protein	pixBAHCDJFG	pixJ	564	187	3e-138	1	0.99	WP_023566316.1	PrsJ	3e-12	29.4%	P42189
Adhesin	PixF protein	pixBAHCDJFG	pixF	519	172	1e-122	1	1	WP_001223370.1	PapF	9e-30	39.0%	P08408
Adhesin	PixG protein	pixBAHCDJFG	pixG	993	330	0.0	1	1	WP_001519250.1	-	-	-	-
Adhesin	Uncharacterized fimbrial-like protein SfmA	sfmACDHF	sfmA	543	180	4e-125	1	1	WP_000776555.1	SfmA	7.2e-122	1	P0ABW6
Adhesin	Probable fimbrial chaperone SfmC	sfmACDHF	sfmC	693	230	5e-167	1	1	WP_000988379.1	SfmC	3.7e-160	99.1%	P77249
Adhesin	Outer membrane usher protein SfmD	sfmACDHF	sfmD	2610	869	0.0	1	1	WP_001347862.1	SfmD	0.0	98.8%	P77468
Adhesin	Uncharacterized fimbrial-like protein SfmH	sfmACDHF	sfmH	1008	335	0.0	1	1	WP_000691054.1	SfmH	0.0	99.1%	P75715
Adhesin	Uncharacterized fimbrial-like protein SfmF	sfmACDHF	sfmF	516	171	2e-120	1	1	WP_001250422.1	SfmF	9.6e-118	97.1%	P38052
Adhesin	Uncharacterized fimbrial-like protein YadC	yadCKLM-htrE-yadVN	yadC	1275	424	0.0	1	1	WP_001331232.1	YadC	0.0	63.9%	P31058
Adhesin	Uncharacterized fimbrial-like protein YadK	yadCKLM-htrE-yadVN	yadK	597	198	3e-144	1	1	WP_000553764.1	YadK	1.7e-115	83.3%	P37016
Adhesin	Uncharacterized fimbrial-like protein YadL	yadCKLM-htrE-yadVN	yadL	603	200	4e-141	1	1	WP_000143205.1	YadL	2.5e-132	97.5%	P37017
Adhesin	Uncharacterized fimbrial-like protein YadM	yadCKLM-htrE-yadVN	yadM	570	189	1e-135	1	1	WP_000591057.1	YadM	7.2e-131	98.9%	P37018
Adhesin	Outer membrane usher protein HtrE	yadCKLM-htrE-yadVN	hrtE	2601	866	0.0	1	1	WP_000153176.1	HrtE	0.0	97.8%	P33129
Adhesin	Probable fimbrial chaperone YadV	yadCKLM-htrE-yadVN	yadV	741	246	0.0	1	1	WP_000465930.1	YadV	2.5e-175	98.8%	P33128
Adhesin	Uncharacterized fimbrial-like protein YadN	yadCKLM-htrE-yadVN	yadN	585	194	7e-137	1	1	WP_000038438.1	YadN	5.6e-135	1	P37050
Adhesin	Uncharacterized fimbrial-system-associated protein YbgO	ybgOPQD	ybgO	1062	353	0.0	1	1	WP_001272420.1	YbgO	0.0	97.5%	P75748
Adhesin	Uncharacterized fimbrial chaperone YbgP	ybgOPQD	ybgP	732	243	0.0	1	1	WP_000143529.1	YbgP	1.2e-158	90.9%	P75749
Adhesin	Uncharacterized outer membrane usher protein YbgQ	ybgOPQD	ybgQ	2451	816	0.0	1	1	WP_001315349.1	YbgQ	0.0	95.7%	P75750
Adhesin	Uncharacterized fimbrial-like protein YbgD	ybgOPQD	ybgD	567	188	4e-136	1	1	WP_000472422.1	YbgD	3.7e-103	79.3%	P37909
Adhesin	Uncharacterized fimbrial-like protein YehA	yehABCD	yehA	1035	344	0.0	1	1	WP_001026154.1	YehA	0.0	98.5%	P33340
Adhesin	Outer membrane usher protein YehB	yehABCD	yehB	2481	826	0.0	1	1	WP_000945406.1	YehB	0.0	98.2%	P33341
Adhesin	Probable fimbrial chaperone YehC	yehABCD	yehC	675	224	2e-160	1	1	WP_000677395.1	YehC	5.6e-158	99.6%	P33342
Adhesin	Uncharacterized fimbrial-like protein YehD	yehABCD	yehD	543	180	3e-126	1	1	WP_000830468.1	YehD	7.3e-122	99.4%	P33343
Adhesin	Uncharacterized fimbrial-like protein YfcV	yfcOPQRSUV	yfcV	564	187	3e-133	1	1	WP_000033328.1	YfcV	1.5e-129	98.4%	P77288
Adhesin	Putative outer membrane usher protein YfcU	yfcOPQRSUV	yfcU	2643	880	0.0	1	1	WP_001112827.1	YfcU	0.0	97.6%	P77196
Adhesin	Probable fimbrial chaperone YfcS	yfcOPQRSUV	yfcS	753	250	0.0	1	1	WP_001281620.1	YfcS	3.3e-164	91.2%	P77599
Adhesin	Uncharacterized fimbrial-like protein YfcR	yfcOPQRSUV	yfcR	507	168	7e-120	1	1	WP_012602034.1	YfcR	4.7e-50	52.2%	P76501
Adhesin	Uncharacterized fimbrial-like protein YfcQ	yfcOPQRSUV	yfcQ	471	156	4e-111	1	1	WP_000822649.1	YfcQ	1.7e-45	50.4%	P76500
Adhesin	Uncharacterized fimbrial-like protein YfcP	yfcOPQRSUV	yfcP	525	174	3e-122	1	1	WP_000730293.1	-	-	-	-
Adhesin	Uncharacterized protein YfcO	yfcOPQRSUV	yfcO	768	255	0.0	1	1	WP_001356216.1	YcfO	2.5e-73	45.9%	P76498
Adhesin	Uncharacterized fimbrial-like protein YgiL	ygiLyqiGHI	ygiL	552	183	9e-132	1	1	WP_001272149.1	YgiL	9.8e-126	99.5%	P39834
Adhesin	Putative outer membrane usher protein YqiG	ygiLyqiGHI	yqiG	2514	837	0.0	1	1	CAR00007.1	YqiG	0.0	97.7%	P76655
Adhesin	Uncharacterized fimbrial chaperone YqiH	ygiLyqiGHI	yqiH	750	249	0.0	1	1	WP_001269825.1	YqiH	3.6e-172	94.0%	P77616
Adhesin	Uncharacterized protein YqiI	ygiLyqiGHI	yqiI	1065	354	0.0	1	1	WP_001269793.1	YqiI	0.0	92.9%	P76656
Adhesin	Uncharacterized fimbrial-like protein YraH	yraHIJK	yraH	585	194	3e-139	1	1	WP_001045442.1	YraH	1.8e-131	94.3	P42913
Adhesin	Probable fimbrial chaperone YraI	yraHIJK	yraI	696	231	1e-170	1	1	WP_033544753.1	YraI	2.1e-162	98.3%	P42914
Adhesin	Outer membrane usher protein YraJ	yraHIJK	yraJ	2517	838	0.0	1	1	WP_001136478.1	YraJ	0.0	99.2%	P42915
Adhesin	Uncharacterized fimbrial-like protein YraK	yraHIJK	yraK	1092	363	0.0	1	1	WP_000817005.1	YraK	0.0	98.1%	P43319
autotransporter	Autotransporter adhesin EhaG	ehaG	ehaG	4851	1616	0.0	1	1	WP_001033224.1	EhaG	0.0	95.7%	Q7DJ60
autotransporter	AidA-I adhesin-like protein MisL	misL	misL	2322	773	0.0	1	1	WP_001307136.1	-	-	-	-
autotransporter	Uncharacterized protein YaiT	yaiT	yaiT	3003	1000	0.0	1	99.8%	WP_000556466.1	YaiT	0.0	62.2%	P77199
autotransporter	Uncharacterized protein YcgV	ycgV	ycgV	2868	955	0.0	1	1	WP_001347958.1	YcgV	0.0	99.7%	P76017
autotransporter	Uncharacterized lipoprotein YdeK	ydeK	ydeK	5421	1806	0.0	1	1	WP_001349923.1	YdeK	0.0	99.1%	P32051	has 482 AA length more than the reference
autotransporter	AIDA-I family autotransporter YfaL - putative adhesin	yfaL	yfaL	3735	1244	0.0	1	1	WP_001220035.1	YfaL	0.0	95.8%	P45508
autotransporter	Uncharacterized protein YhjY	yhjY	yhjY	699	232	2e-170	1	1	WP_001296791.1	YhjY	2.7e-168	99.1%	P37663
autotransporter	AidA-I adhesin-like protein YuaQ	yuaQ	yuaQ	4050	1349	0.0	1	1	WP_023277486.1	YuaQ	0.0	45.2%	Q9JMS3	This Region has high identity (98.4%) with the protein EhaA from O157:H7 (A0A0H3JBV3), but this protein is not in swiss prot database
autotransporter	Autotransporter protein			2298	765	0.0	1	1	WP_000798056.1	-	-	-	-
colonization	ClpB protein	clpB	clpB	2574	857	0.0	1	1	WP_020239930.1	clpB	0.0	1	P63284
colonization	Uncharacterized lipoprotein YgeQ	ygeQ	ygeQ	1611	536	0.0	1	1	WP_072133936.1	YgeQ	0.0	97.7%	Q46797	the sequence in EC121 is 276 aa longer in C-terminal region
copper resistance / invasin	Copper/silver efflux RND transporter outer membrane channel CusC	cusCFBA	cusC / ibeB	1380	459	0.0	1	1	WP_000074245.1	CusC	0.0	99.8%	P77211	also known as IbeB, is involved in invasion of brain microvascular endothelial cells
copper resistance / invasin	Copper/silver efflux RND transporter, periplasmic protein CusF	cusCFBA	cusF	333	110	6e-75	1	1	WP_000709879.1	CusF	2.3e-72	99.1%	P77214
copper resistance / invasin	Copper/silver efflux RND transporter, membrane fusion protein CusB	cusCFBA	cusB	1224	407	0.0	1	1	WP_000739021.1	CusB	0.0	99.5%	P77239
copper resistance / invasin	Copper/silver efflux RND transporter, transmembrane protein CusA	cusCFBA	cusA	3144	1047	0.0	1	1	WP_000573943.1	CusA	0.0	99.9%	P38054
immune evasion	Superoxide dismutase [Fe] (EC 1.15.1.1)	sodB	sodB	582	193	5e-140	1	1	WP_000007283.1	SodB	3.1e-143	1	P0AGD6
immune evasion	Thioredoxin	trxA	trxA	330	109	9e-74	1	1	AAN83133.1	TrxA	5.4e-74	1	P0AA28
Intracelular replication	FKBP-type peptidyl-prolyl cis-trans isomerase FkpA	fkpA	fkpA	813	270	0.0	1	1	WP_000838261.1	FkpA	0.0	1	P65764
Intracelular spread	Outer-membrane-phospholipid-binding lipoprotein MlaA / VacJ-like protein	mlaA	mlaA	756	251	0.0	1	1	WP_000776768.1	MlaA	0.0	99.6%	P43262
Invasin	Outer membrana protein A	ompA	ompA	1065	354	0.0	1	1	EDU70297.1	OmpA	0.0	1	P0A910
Invasin	intimin-like invasin YchO	ychO	ychO	1395	464	0.0	1	99.4%	WP_000086213.1	-	-	-	-
Invasion	Phosphoethanolamine transferase EptC	yijP / eptC	eptC	1734	577	0.0	1	1	WP_000556295.1	EptC	0.0	0.99	P0CB40
iron aquisition system	Enterobactin synthase component D	entDfepAfesybdZentFfepECGDentSfepBentCEBAH	entD	630	209	9e-155	1	1	WP_000228134.1		5.8e-149	0.99	P0A3C0
iron aquisition system	Ferrienterobactin receptor	entDfepAfesybdZentFfepECGDentSfepBentCEBAH	fepA	2241	746	0.0	1	1	WP_001034868.1	FepA	0.0	99.3%	P05825
iron aquisition system	Enterochelin esterase	entDfepAfesybdZentFfepECGDentSfepBentCEBAH	fes	1203	400	0.0	1	1	WP_000125818.1		0.0	98.8%	P13039
iron aquisition system	Enterobactin biosynthesis protein YbdZ	entDfepAfesybdZentFfepECGDentSfepBentCEBAH	ydbZ	219	72	4e-45	1	1	WP_000885781.1	YdbZ	1e-58	95.8%	P18393
iron aquisition system	Enterobactin synthase component F, serine activating enzyme (EC 2.7.7.-)	entDfepAfesybdZentFfepECGDentSfepBentCEBAH	entF	3882	1293	0.0	1	1	WP_000077708.1	EntF	0.0	97.8%	P11454
iron aquisition system	Ferric enterobactin transport protein FepE	entDfepAfesybdZentFfepECGDentSfepBentCEBAH	fepE	1134	377	0.0	1	1	WP_000096713.1	FepE	0.0	97.9%	P26266
iron aquisition system	Ferric enterobactin transport ATP-binding protein FepC (TC 3.A.1.14.2)	entDfepAfesybdZentFfepECGDentSfepBentCEBAH	fepC	816	271	0.0	1	1	WP_000140647.1	FepC	0.0	1	P23878
iron aquisition system	Ferric enterobactin transport system permease protein FepG (TC 3.A.1.14.2)	entDfepAfesybdZentFfepECGDentSfepBentCEBAH	fepG	993	330	0.0	1	1	WP_000640969.1	FepG	0.0	99.4%	P23877
iron aquisition system	Ferric enterobactin transport system permease protein FepD (TC 3.A.1.14.2)	entDfepAfesybdZentFfepECGDentSfepBentCEBAH	fepD	1005	334	0.0	1	1	WP_001295314.1	FepD	0.0	99.4%	P23876
iron aquisition system	Enterobactin exporter EntS	entDfepAfesybdZentFfepECGDentSfepBentCEBAH	entS	1251	416	0.0	1	1	WP_001041789.1	EntS	0.0	1	Q3Z4K2
iron aquisition system	Ferrienterobactin-binding periplasmic protein FepB (TC 3.A.1.14.2)	entDfepAfesybdZentFfepECGDentSfepBentCEBAH	fepB	957	318	0.0	1	1	WP_001234312.1	FepB	0.0	99.7%	P0AEL6
iron aquisition system	Isochorismate synthase EntC (EC 5.4.4.2) of siderophore biosynthesis	entDfepAfesybdZentFfepECGDentSfepBentCEBAH	entC	1176	391	0.0	1	1	WP_001351525.1	EntC	0.0	99.7%	P0AEJ2
iron aquisition system	Enterobactin synthase component E (EC 2.7.7.58)	entDfepAfesybdZentFfepECGDentSfepBentCEBAH	entE	1611	536	0.0	1	1	WP_000026809.1	EntE	0.0	99.4%	P10378
iron aquisition system	Enterobactin synthase component B (EC 3.3.2.1)	entDfepAfesybdZentFfepECGDentSfepBentCEBAH	entB	858	285	0.0	1	1	WP_001007122.1	EntB	0.0	99.3%	P0ADI6
iron aquisition system	2,3-dihydro-2,3-dihydroxybenzoate dehydrogenase (EC 1.3.1.28)	entDfepAfesybdZentFfepECGDentSfepBentCEBAH	entA	747	248	6e-180	1	1	WP_000347664.1	EntA	1.5e-171	98.8%	P15047
iron aquisition system	Proofreading thioesterase EntH	entDfepAfesybdZentFfepECGDentSfepBentCEBAH	entH	414	137	7e-97	1	1	WP_000637953.1	EntH	4.5e-98	1	Q32IX2
iron aquisition system	Ferric hydroxamate outer membrane receptor FhuA	FhuACDB	fhuA	2244	747	0.0	1	1	WP_107183805.1	FhuA	0.0	1	P06971
iron aquisition system	Ferric hydroxamate ABC transporter (TC 3.A.1.14.3), ATP-binding protein FhuC	FhuACDB	fhuC	798	265	0.0	1	1	WP_001158933.1	FhuC	0.0	98.5%	P07821
iron aquisition system	Ferric hydroxamate ABC transporter (TC 3.A.1.14.3), periplasmic substrate binding protein FhuD	FhuACDB	fhuD	891	296	0.0	1	1	WP_000015990.1	FhuD	0.0	99.3%	P07822
iron aquisition system	Ferric hydroxamate ABC transporter (TC 3.A.1.14.3), permease component FhuB	FhuACDB	fhuB	1983	660	0.0	1	1	WP_000044096.1	FhuB	0.0	99.5%	P06972
iron aquisition system	Salmochelin biosynthesis C-glycosyltransferase IroB	iroBCDEN	iroB	1116	371	0.0	1	1	WP_001318220.1	-	-	-	-
iron aquisition system	Salmochelin ABC transporter protein IroC	iroBCDEN	iroC	3660	1219	0.0	1	1	WP_001111199.1	-	-	-	-
iron aquisition system	Salmochelin catecholate siderophore esterase IroD	iroBCDEN	iroD	1230	409	0.0	1	1	WP_000933675.1	-	-	-	-
iron aquisition system	Salmochelin catecholate periplasmic esterase IroE	iroBCDEN	iroE	957	318	0.0	1	1	WP_000271276.1	-	-	-	-
iron aquisition system	Salmochelin outer membrane siderophore receptor IroN	iroBCDEN	iroN	2178	725	0.0	1	1	WP_094317250.1	-	-	-	-
iron aquisition system	Manganese ABC transporter, periplasmic-binding protein SitA	sitABCD	sitA	915	304	0.0	1	1	WP_000949004.1	-	-	-	-
iron aquisition system	Manganese ABC transporter, ATP-binding protein SitB	sitABCD	sitB	828	275	0.0	1	1	WP_000983710.1	-	-	-	-
iron aquisition system	Manganese ABC transporter, inner membrane permease protein SitC	sitABCD	sitC	858	285	0.0	1	1	WP_000992806.1	-	-	-	-
iron aquisition system	Manganese ABC transporter, inner membrane permease protein SitD	sitABCD	sitD	858	285	0.0	1	1	WP_000968140.1	-	-	-	-
Kinase	GTP pyrophosphokinase (EC 2.7.6.5), (p)ppGpp synthetase I	relA	relA	2235	744	0.0	1	1	WP_000226815.1	ppGpp	0.0	1	P0AG20
Protease / immune evasion	Protease 7	ompTc	ompT	954	317	0.0	1	1	WP_001201825.1	OmpT	0.0	99.1%	P58603
Protease / immune evasion	Protease 7	ompTp	ompT	954	317	0.0	1	1	WP_000280980.1	OmpT	0.0	74.1%	P58603	73% identy between ompT variants
Regulator	Transcription antitermination protein RfaH	rfaH	rfaH	489	162	1e-117	1	1	WP_001192396.1	RfaH	1e-113	1	P0AFW0
Regulator	Transcriptional regulator SlyA	slyA	slyA	435	144	7e-97	1	1	WP_001296943.1	SlyA	1.4e-95	1	P0A8W4
Regulator	BarA-associated response regulator UvrY (= GacA = SirA)	uvrY / sirA	uvrY	657	218	1e-159	1	1	WP_000611328.1	UvrY	2.9e-149	1	P66797
Regulon	Fimbriae Z protein	fimZ	fimZ	633	210	2e-151	1	1	WP_000805428.1	FimZ	1.7e-144	1	P0AEL8	in EC121 genome this is the last gene on the fimbrial operon sfmACDHF
Two-component system	Copper sensory histidine kinase CusS	cusSR	cusS	1449	482	0.0	1	1	WP_000253830.1	CusS	0.0	97.7%	Q8XBY4
Two-component system	Transcriptional regulatory protein CusR	cusSR	cusR	684	227	3e-162	1	1	WP_000770953.1	CusR	6.9e-158	1	P0ACZ9
two-component system	Sensor protein EvgS	evgAS	evgS	3594	1197	0.0	1	1	WP_001347876.1	EvgS	0.0	99.0%	P30855
two-component system	Positive transcription regulator EvgA	evgAS	evgA	615	204	2e-147	1	1	WP_000991370.1	EvgA	4.8e-141	1	P0ACZ7
two-component system	Phosphoglycerate transport system transcriptional regulatory protein PgtA	pgtAB	pgtA	1248	415	0.0	1	1	WP_024198271.1	PgtA	0.0	80.7%	P06184
two-component system	Phosphoglycerate transport system sensor protein PgtB (EC 2.7.3.-)	pgtAB	pgtB	2010	669	0.0	1	1	WP_000790444.1	PgtB	0.0	83.4%	P37433
two-component system	Transcriptional regulatory protein PhoP	phoPQ	phoP	672	223	4e-161	1	1	WP_001265481.1	PhoP	6.7e-155	1	Q8CXZ9
two-component system	Sensor histidine kinase PhoQ	phoPQ	phoQ	1461	486	0.0	1	1	WP_000735406.1	PhoQ	0.0	99.6%	Q8FIB8
two-component system	two-component system response regulator QseB	qseBC	qseB	660	219	1e-156	1	1	WP_001221502.1	QseB	4.9e-155	1	Q8XBS3
two-component system	two-component system sensor histidine kinase QseC	qseBC	qseC	1350	449	0.0	1	1	WP_000673354.1	QseC	0.0	98.9%	Q8X524
Vesycle production / immune evasion	Hemolysin F	mig-14hlyF	hlyF	1110	369	0.0	1	1	WP_000771475.1	-	-	-	-
Vesycle production / immune evasion	Mig-14 ortholog protein	mig-14hlyF	mig-14	909	302	0.0	1	1	WP_000175738.1	-	-	-	-
virulence	Periplasmic serine endoprotease DegP	degP	degP	1425	474	0.0	1	1	WP_000753946.1	DegP	0.0	1	P0C0V0
virulence expression	Thiol:disulfide interchange protein DsbA	dsbA	dsbA	627	208	1e-152	1	1	WP_000725337.1	DsbA	6.4e-148	1	P0AEG4

## Sheet: truncated or incompleted
						NCBI				swiss-prot
Traits	cluster/operon	virulence factor	Gene	AA Length	expected length	e-value	cover	identity	reference	protein	e-value	identity	reference
Invasion	aslAB	Arylsulfatase	aslA	53	551	8e-28	0.12	0.96	WP_000395863.1	aslA	1.2e-25	95.7%	P25549
Invasion	aslAB	Anaerobic sulfatase-maturating enzyme homolog AslB	aslB	411	411	0.0	1	1	WP_000941530.1	aslB	0.0	97.3%	P25550
autotransporter	yejO	Uncharacterized outer membrane protein YejO	yejO	771		0.0	1	1	WP_001347786.1	YejO	0.0	96.8%	P33924
autotransporter	yejO	Uncharacterized outer membrane protein YejO	yejO	70
Toxin	espL1	ShET2/EspL2 family type III secretion system effector toxin	espL1	371		0.0	1	1	WP_000081103.1	-	-	-	-
Toxin	espL4	ShET2/EspL2 family type III secretion system effector toxin	espL4	524		0.0	1	1	WP_000632874.1	-	-	-	-
Toxin	vgrG1	type VI secretion system tip protein VgrG	vgrG	713		0.0	1	1	WP_000103360.1	VgrG1	1.2e-131	40.3%	Q9KS45
Toxin	HcpA	Hcp family type VI secretion system effector	hcpA	172		3e-127	1	1	WP_001142958.1		2.8e-68	58.8	Q9HI36
T6SS	VipA	type VI secretion system contractile sheath small subunit	vipA	166		5e-116	1	1	WP_000037391.1	-	-	-	-
T6SS	vipB	type VI secretion system contractile sheath large subunit	vipB	461		0.0	1	1	WP_000056980.1	-	-	-	-
Colicin	cmi	colicin M immunity protein	cmi	117	141	1e-82	1	1	WP_105457450.1	cmi	7.3e-82	99.1%	P18002
Colicin	cbi	colicin B immunity protein	cbi	175		4e-122	1	1	WP_000203272.1	Cbi	8.1e-120	98.3%	P22426
Colicin	cvaAB	Colicin V secretion/processing ATP-binding protein CvaB	cvaB	271	698	0.0	0.99	1	WP_109045958.1	CvaB	0.0	99.7%	P22520
Colicin	cvaAB	Colicin V secretion/processing ATP-binding protein CvaB	cvaB	621	698	0.0	1	1	WP_139816159.1	CvaB	0.0	99.7%	P22520]	is missing 77 aa in N-terminal region
Colicin	cvaCcvi	Colicin-V	cvaC	103	103	6e-68	1	1	WP_001259758.1	CvaC	1.3e-70	1	P22522
Colicin	cba	Colicin-B	cba	46	511	4e-22	1	97.83%	ORD13212.1	Cba	4.4e-29	95.7	P05819

## Sheet: Putative
	Patric					NCBI protein-protein BLAST				swiss-prot
Traits	virulence factor	cluster/operon	Gene	NA Length	AA Length	e-value	cover	identity	reference	protein	e-value	identity	reference	Variant homology/observation
Adhesin	Yde Fimbriae	fimACDydeSfimGH	fimA	564	187	5e-108	0.99	99.47%	WP_001360630.1	Type-1A pilin	4.1e-75	64.7%	P04128	present in O157:H7 as Fimbrial protein under accesion Q8X503 (fmlA gene), with 100% of identity
Adhesin	Yde Fimbriae	fimACDydeSfimGH	fimC	711	236	4e-174	0.99	1	WP_001195166.1	FocC	4.9e-92	67.1%	P62609	present in O157:H7 as Fimbrial chaperone protein under accesion A0A0H3JF06 (fmlA gene), with 99.2% of identity
Adhesin	Yde Fimbriae	fimACDydeSfimGH	fimD	2652	883	0.0	0.99	1	WP_001348041.1	FocD	0.0	0.53	P46009
Adhesin	Yde Fimbriae	fimACDydeSfimGH	ydeS	531	176	6e-126	1	99.4%	EU900985.1	YdeS	3.7e-121	98.9%	P77789
Adhesin	Yde Fimbriae	fimACDydeSfimGH	fimG	504	167	2e-119	1	1	WP_000825458.1	YdeR	1.7e-115	99.4%	P77294	it presents 57.8% identity with FimG protein of Type 1 fimbriae; and 40.4% of identity with SfaS adhesin protein of S fimbriae
Adhesin	Yde Fimbriae	fimACDydeSfimGH	fimH	915	304	0.0	1	1	WP_000520679.1	YdeQ	0.0	0.99	P77588
Adhesin	CFA/I fimbrial subunit A - Chaperone	cfaABCE	cfaA	624	208	1e-149	1	1	WP_032157740.1	CfaA	4.3e-26	0.41	P25732	This region also presents 33.9 % of identity with protein CS1 fimbrial subunit B (P25731)
Adhesin	CFA/I fimbrial subunit B - major Pilin	cfaABCE	cfaB	501	166	1e-114	1	1	WP_000755097.1	CfaB	2.9e-22	36.3%	E3PPC4
Adhesin	CFA/I fimbrial subunit C - Usher	cfaABCE	cfaC	2703	900	0.0	1	1	WP_001315858.1	CfaC	4.6e-106	29.3%	P25733	This region presents serin rich region, similar to those from Staphylococcus adhesins involved in adherence with platelets
Adhesin	CFA/I fimbrial subunit E - minor Pilin	cfaABCE	cfaE	1089	362	0.0	1	1	WP_001245988.1	CfaE	1.2e-23	27.8%	P25734
Toxin	type VI secretion system tip protein VgrG	vgrG	vgrG	1902	633	0.0	1	1	WP_000103246.1	VgrG1	2.3e-137	40.8%	Q9KS45
