# Supplementary material for: Virulence Potential of a Multidrug-Resistant Escherichia coli Strain Belonging to the Emerging Clonal Group ST101-B1 Isolated from Bloodstream Infection
Source: Microorganisms. 2020 May 30;8(6):827. doi: 10.3390/microorganisms8060827 (PMC7355805; doi:10.3390/microorganisms8060827)
Supplement: Supplementary file 1 [file microorganisms-08-00827-s001.zip › Suppl/Table S5 Detailed predicted phages.xlsx]

## Sheet: Details of the phages regions
Detailed information of all predicted phages detected in EC121
NODE_1				Region 1, total 6 CDS
	converting phage	phenotype	accession number
				#	CDS Position	BLAST Hit	E-Value
	No	-	-	1	complement(286560..287624)	PHAGE_Bacill_G_NC_023719: gp243; PP_00282; phage(gi593777699)	6.76e-08
	No	-	-	2	complement(287617..288819)	PHAGE_Bacill_G_NC_023719: gp245; PP_00283; phage(gi593777701)	9.30e-36
	No	-	-	3	complement(289174..290133)	PHAGE_Entero_phiEF24C_NC_009904: putative ribonucleotide reductase; PP_00284; phage(gi158079504)	1.32e-107
	No	-	-	4	complement(290143..292287)	PHAGE_Entero_phiEF24C_NC_009904: putative ribonucleotide reductase; PP_00285; phage(gi158079505)	0.0
	No	-	-	5	complement(292260..292670)	PHAGE_Bacill_SP_10_NC_019487: ribonucleotide reductase stimulatory protein; PP_00286; phage(gi418489617)	1.67e-18
	No	-	-	6	complement(292667..292912)	PHAGE_Mycoba_Adler_NC_023591: glutaredoxin-like protein NrdH; PP_00287; phage(gi589892251)	2.30e-16
NODE_7				Region 2, total 27 CDS
	converting phage	phenotype	accession number	#	CDS Position	BLAST Hit	E-Value
	Yes	stx1a	NC_029120	1	complement(8207..8629)	PHAGE_Shigel_Stx_NC_029120: LygF; PP_00010; phage(gi985761265)	1.05e-62
	-	-	-	2	8637..8648	attL	0.0
	Yes	LPS change	NC_022749	3	complement(8670..9635)	PHAGE_Shigel_SfIV_NC_022749: replication protein; PP_00011; phage(gi557307567)	2.68e-73
	No	-	-	4	complement(9616..10137)	PHAGE_Pectob_ZF40_NC_019522: putative cII repressor; PP_00012; phage(gi422936652)	1.78e-05
	No	-	-	5	complement(10121..10351)	PHAGE_Pectob_ZF40_NC_019522: putative cro anti-repressor; PP_00013; phage(gi422936651)	7.84e-12
	No	-	-	6	10609..10842	PHAGE_Cronob_phiES15_NC_018454: putative transcriptional repressor DicA; PP_00014; phage(gi401817574)	9.96e-22
	No	-	-	7	11009..11164	PHAGE_Salico_CGphi29_NC_020844: hypothetical protein; PP_00015; phage(gi472340166)	5.10e-12
	-	-	-	8	11166..11294	hypothetical; PP_00016	0.0
	-	-	-	9	11324..11542	hypothetical; PP_00017	0.0
	-	-	-	10	complement(11844..11999)	hypothetical; PP_00018	0.0
	-	-	-	11	12110..12298	hypothetical; PP_00019	0.0
	-	-	-	12	12295..12486	hypothetical; PP_00020	0.0
	No	-	-	13	12580..15051	PHAGE_Salmon_118970_sal3_NC_031940: zinc finger protein; PP_00021; phage(gi100107)	2.46e-69
	-	-	-	14	complement(15048..16052)	hypothetical; PP_00022	0.0
	-	-	-	15	complement(16258..16584)	hypothetical; PP_00023	0.0
	-	-	-	16	16719..17060	hypothetical; PP_00024	0.0
	No	-	-	17	17095..17655	PHAGE_Bacill_SPbeta_NC_001884: hypothetical protein; PP_00025; phage(gi9630137)	8.32e-09
	-	-	-	18	complement(17658..18281)	hypothetical; PP_00026	0.0
	-	-	-	19	18476..18781	hypothetical; PP_00027	0.0
	-	-	-	20	18980..20458	hypothetical; PP_00028	0.0
	-	-	-	21	complement(20923..21912)	hypothetical; PP_00029	0.0
	-	-	-	22	complement(21999..22508)	hypothetical; PP_00030	0.0
	-	-	-	23	complement(22624..22836)	hypothetical; PP_00031	0.0
	No	-	-	24	complement(22836..23927)	PHAGE_Klebsi_F19_NC_023567: HNH endonuclease; PP_00032; phage(gi589890510)	1.20e-06
	No	-	-	25	complement(24324..24692)	PHAGE_Salmon_7_11_NC_015938: hypothetical protein; PP_00033; phage(gi345461156)	5.41e-06
	No	-	-	26	complement(25215..26813)	PHAGE_Strept_YMC_2011_NC_018285: integrase; PP_00034; phage(gi399498686)	8.95e-10
	-	-	-	27	39130..39141	attR	0.0
				Region 3, total 18 CDS
	converting phage	phenotype	accession number	#	CDS Position	BLAST Hit	E-Value
	No	-	-	1	155658..156704	PHAGE_Escher_vB_EcoM_JS09_NC_024124: phospho-2-dehydro-3-deoxyheptonate aldolase; PP_00159; phage(gi642906018)	3.54e-94
	-	-	-	2	156836..157027	hypothetical; PP_00160	0.0
	No	-	-	3	complement(157031..157741)	PHAGE_Microc_MaMV_DC_NC_029002: hypothetical protein; PP_00161; phage(gi971764737)	2.65e-16
	No	-	-	4	157841..158908	PROPHAGE_Escher_MG1655: Qin prophage; predicted side tail fibre assembly protein; PP_00162; phage(gi16129506)	9.89e-87
	No	-	-	5	158920..159507	PROPHAGE_Escher_MG1655: Qin prophage; predicted tail fibre assembly protein; PP_00163; phage(gi16129505)	6.92e-128
	-	-	-	6	159602..160780	hypothetical; PP_00164	0.0
	No	-	-	7	complement(160877..161365)	PHAGE_Entero_P88_NC_026014: tail protein; PP_00165; phage(gi744692744)	2.42e-117
	No	-	-	8	complement(161378..164185)	PHAGE_Entero_P88_NC_026014: tail tape measure protein; PP_00166; phage(gi744692745)	0.0
	No	-	-	9	complement(164172..164300)	PHAGE_Entero_P88_NC_026014: tail fiber protein; PP_00167; phage(gi744692746)	1.62e-23
	No	-	-	10	complement(164336..164701)	PHAGE_Entero_P88_NC_026014: tail protein; PP_00168; phage(gi744692747)	1.48e-80
	No	-	-	11	complement(164756..165268)	PHAGE_Entero_P88_NC_026014: major tail tube protein; PP_00169; phage(gi744692748)	7.23e-121
	No	-	-	12	complement(165268..166452)	PHAGE_Entero_P88_NC_026014: tail sheath monomer; PP_00170; phage(gi744692749)	0.0
	No	-	-	13	166432..166563	PHAGE_Entero_P88_NC_026014: hypothetical protein; PP_00171; phage(gi744692750)	5.12e-25
	No	-	-	14	166610..167719	PHAGE_Entero_P88_NC_026014: gene D protein; PP_00172; phage(gi744692751)	0.0
	-	-	-	15	167914..168579	hypothetical; PP_00173	0.0
	No	-	-	16	168729..168989	PHAGE_Yersin_L_413C_NC_004745: Ogr; PP_00174; phage(gi30065732)	9.21e-09
	No	-	-	17	169180..169320	PHAGE_Entero_P88_NC_026014: hypothetical protein; PP_00175; phage(gi744692752)	5.48e-26
	No	-	-	18	complement(169624..169923)	PHAGE_Geobac_E3_NC_029073: hypothetical protein; PP_00176; phage(gi985758341)	1.32e-18
NODE_8				Region 4 total 18 CDS
	converting phage	phenotype	accession number	#	CDS Position	BLAST Hit	E-Value
	No	-	-	1	86553..86565	attL	0.0
	Yes	stx1a	NC_029120	2	complement(93345..93767)	PHAGE_Shigel_Stx_NC_029120: LygF; PP_00092; phage(gi985761265)	1.29e-62
	Yes	stx1a	NC_029120	3	complement(93808..94878)	PHAGE_Shigel_Stx_NC_029120: primosomal protein I; PP_00093; phage(gi985761262)	4.84e-71
	No	-	-	4	complement(94950..95375)	PHAGE_Pectob_ZF40_NC_019522: putative cII repressor; PP_00094; phage(gi422936652)	5.73e-07
	No	-	-	5	complement(95372..95626)	PHAGE_Escher_HK75_NC_016160: regulatory protein cro; PP_00095; phage(gi356870715)	3.23e-24
	No	-	-	6	95706..96125	PHAGE_Entero_HK022_NC_002166: regulatory protein cI; PP_00096; phage(gi19343388)	1.14e-25
	-	-	-	7	96412..96546	hypothetical; PP_00097	0.0
	No	-	-	8	96557..96712	PHAGE_Salico_CGphi29_NC_020844: hypothetical protein; PP_00098; phage(gi472340166)	6.26e-13
	-	-	-	9	complement(96709..97137)	hypothetical; PP_00099	0.0
	Yes	stx1a	NC_029120	10	97639..97860	PHAGE_Shigel_Stx_NC_029120: Kil protein; PP_00100; phage(gi985761255)	8.80e-44
	No	-	-	11	97854..98030	PHAGE_Phage_Gifsy_1_NC_010392: hypothetical protein; PP_00101; phage(gi169257260)	7.48e-07
	-	-	-	12	98105..98380	hypothetical; PP_00102	0.0
	Yes	stx1a	NC_029120	13	98482..101082	PHAGE_Shigel_Stx_NC_029120: exodeoxyribonuclease VIII; PP_00103; phage(gi985761253)	1.20e-170
	No	-	-	14	101075..101884	PHAGE_Salmon_epsilon15_NC_004775: RecT; PP_00104; phage(gi30387413)	5.85e-107
	-	-	-	15	complement(101957..102079)	hypothetical; PP_00105	0.0
	Yes	stx2	NC_000924	16	102416..102631	PHAGE_Entero_933W_NC_000924: putative excisionase; PP_00106; phage(gi9632468)	4.57e-05
	No	-	-	17	102690..103868	PHAGE_Salmon_Fels_1_NC_010391: putative bacteriophage integrase; PP_00107; phage(gi169257156)	2.29e-105
				18	106583..106595	attR	0.0
NODE_10				Region 5, total 25 CDS
	converting phage	phenotype	accession number	#	CDS Position	BLAST Hit	E-Value
	-	-	-	1	96933..96945	attL	0.0
	-	-	-	2	96933..96945	attL	0.0
	No	-	-	3	100803..101453	PHAGE_Pseudo_F116_NC_006552: hypothetical protein; PP_00086; phage(gi56692976)	2.43e-46
	-	-	-	4	101556..101858	hypothetical; PP_00087	0.0
	-	-	-	5	102107..102484	hypothetical; PP_00088	0.0
	No	-	-	6	complement(102521..102664)	PHAGE_Salmon_vB_SosS_Oslo_NC_018279: error-prone lesion bypass DNA polymerase V; PP_00089; phage(gi399528790)	4.88e-16
	No	-	-	7	complement(102919..103470)	PHAGE_Escher_pro483_NC_028943: DNA invertase; PP_00090; phage(gi971758535)	2.48e-115
	Yes	LPS change	NC_021857	8	complement(104007..104903)	PHAGE_Shigel_SfII_NC_021857: tail sheath protein; PP_00091; phage(gi526244647)	1.23e-168
	Yes	LPS change	NC_021857	9	complement(104887..105057)	PHAGE_Shigel_SfII_NC_021857: hypothetical protein; PP_00092; phage(gi526244646)	1.19e-33
	Yes	LPS change	NC_021857	10	complement(105066..106196)	PHAGE_Shigel_SfII_NC_021857: large terminase subunit; PP_00093; phage(gi526244638)	0.0
	Yes	LPS change	NC_021857	11	complement(106193..106414)	PHAGE_Shigel_SfII_NC_021857: small terminase subunit; PP_00094; phage(gi526244637)	1.05e-37
	-	-	-	12	106380..106529	hypothetical; PP_00095	0.0
	Yes	LPS change	NC_021857	13	complement(106651..106911)	PHAGE_Shigel_SfII_NC_021857: Cro repressor; PP_00096; phage(gi526244672)	6.04e-57
	Yes	LPS change	NC_021857	14	107054..107701	PHAGE_Shigel_SfII_NC_021857: CI repressor; PP_00097; phage(gi526244671)	1.73e-157
	-	-	-	15	108041..108247	hypothetical; PP_00098	0.0
	Yes	LPS change	NC_022749	16	complement(108219..108428)	PHAGE_Shigel_SfIV_NC_022749: hypothetical protein; PP_00099; phage(gi557307562)	1.19e-45
	Yes	LPS change	NC_021857	17	109198..109734	PHAGE_Shigel_SfII_NC_021857: hypothetical protein; PP_00100; phage(gi526244668)	8.80e-131
	Yes	LPS change	NC_021857	18	109731..110087	PHAGE_Shigel_SfII_NC_021857: hypothetical protein; PP_00101; phage(gi526244667)	1.33e-82
	Yes	LPS change	NC_021857	19	110087..110392	PHAGE_Shigel_SfII_NC_021857: hypothetical protein; PP_00102; phage(gi526244666)	5.37e-69
	Yes	LPS change	NC_021857	20	110619..111782	PHAGE_Shigel_SfII_NC_021857: integrase; PP_00103; phage(gi526244664)	0.0
	-	-	-	21	111803..111815	attR	0.0
	No	-	-	22	111955..113178	PHAGE_Synech_S_CBP1_NC_025456: integrase; PP_00104; phage(gi712915430)	6.70e-10
	No	-	-	23	complement(113209..113487)	PHAGE_Entero_phiFL1A_NC_013646: hypothetical protein; PP_00105; phage(gi281416328)	2.40e-09
	No	-	-	24	complement(113826..115670)	PHAGE_Escher_phAPEC8_NC_020079: hypothetical protein; PP_00106; phage(gi448260430)	4.54e-81
	-	-	-	25	125506..125518	attR	0.0
NODE_15				Region 6, total 21 CDS
	converting phage	phenotype	accession number	#	CDS Position	BLAST Hit	E-Value
	-	-	-	1	30547..30558	attL	0.0
	No	-	-	2	complement(30931..31962)	PHAGE_Salmon_Fels_2_NC_010463: integrase; PP_00027; phage(gi169936064)	1.11e-128
	No	-	-	3	complement(32358..32927)	PHAGE_Salmon_Fels_2_NC_010463: P2 CI-like protein; PP_00028; phage(gi169936063)	1.24e-44
	No	-	-	4	33073..33276	PHAGE_Haemop_HP2_NC_003315: orf2(S)cox; PP_00029; phage(gi17981819)	6.06e-09
	No	-	-	5	33341..34099	PHAGE_Salmon_Fels_2_NC_010463: bacteriophage regulatory protein CII; PP_00030; phage(gi169936061)	3.68e-71
	No	-	-	6	34096..34524	PHAGE_Salmon_Fels_2_NC_010463: P2 LysB-like protein; PP_00031; phage(gi169936038)	4.50e-64
	No	-	-	7	34484..34654	PHAGE_Salmon_Fels_2_NC_010463: P2 LysC-like protein; PP_00032; phage(gi169936037)	4.45e-24
	No	-	-	8	34620..35051	PHAGE_Salmon_Fels_2_NC_010463: P2 gpR-like tail completion protein; PP_00033; phage(gi169936036)	3.96e-92
	No	-	-	9	35044..35490	PHAGE_Salmon_Fels_2_NC_010463: P2 gpS-like tail completion protein; PP_00034; phage(gi169936035)	4.69e-92
	No	-	-	10	complement(35517..36383)	PHAGE_Salmon_RE_2010_NC_019488: hypothetical protein; PP_00035; phage(gi418489708)	4.92e-41
	No	-	-	11	36591..37430	PHAGE_Salmon_Fels_2_NC_010463: major tail sheath protein; PP_00036; phage(gi169936025)	0.0
	No	-	-	12	37440..37955	PHAGE_Salmon_Fels_2_NC_010463: major tail tube protein; PP_00037; phage(gi169936024)	8.14e-118
	No	-	-	13	38010..38312	PHAGE_Salmon_Fels_2_NC_010463: P2 gpE-like tail protein; PP_00038; phage(gi169936023)	1.50e-58
	No	-	-	14	38327..39883	PHAGE_Salmon_Fels_2_NC_010463: P2 gpT-like tail protein; PP_00039; phage(gi169936021)	2.64e-163
	No	-	-	15	39880..40365	PHAGE_Salmon_Fels_2_NC_010463: P2 gpU-like tail protein; PP_00040; phage(gi169936020)	2.86e-98
	No	-	-	16	40362..41462	PHAGE_Salmon_Fels_2_NC_010463: tail protein; PP_00041; phage(gi169936019)	0.0
	No	-	-	17	41553..41771	PHAGE_Salmon_Fels_2_NC_010463: P2 gpOgr-like protein (acttivation of late gene expression); PP_00042; phage(gi169936018)	8.30e-29
	-	-	-	18	complement(42007..43692)	hypothetical; PP_00043	0.0
	-	-	-	19	43962..44339	hypothetical; PP_00044	0.0
	No	-	-	20	complement(44369..44626)	PHAGE_Cronob_vB_CsaM_GAP32_NC_019401: glutaredoxin; PP_00045; phage(gi414087106)	2.52e-17
	-	-	-	21	44966..44977	attR	0.0
NODE_17				Region 7, total 15 CDS
	converting phage	phenotype	accession number	#	CDS Position	BLAST Hit	E-Value
	No	-	-	1	complement(26152..26448)	PHAGE_Strept_phiARI0131_2_NC_031941: hypothetical protein; PP_00043; phage(gi100035)	3.94e-06
	-	-	-	2	complement(26947..27117)	hypothetical; PP_00044	0.0
	-	-	-	3	complement(27077..27469)	hypothetical; PP_00045	0.0
	-	-	-	4	27842..28183	hypothetical; PP_00046	0.0
	No	-	-	5	28275..28466	PHAGE_Burkho_KS14_NC_015273: gp43; PP_00047; phage(gi327198312)	1.52e-16
	-	-	-	6	28516..28797	hypothetical; PP_00048	0.0
	-	-	-	7	complement(29138..29269)	hypothetical; PP_00049	0.0
	No	-	-	8	complement(29360..30601)	PHAGE_Gordon_Bachita_NC_030936: hypothetical protein; PP_00050; phage(gi100111)	2.72e-21
	-	-	-	9	complement(30918..31073)	hypothetical; PP_00051	0.0
	No	-	-	10	complement(31030..31605)	PHAGE_Caulob_CcrColossus_NC_019406: putative TerD-like bacterial stress protein; PP_00052; phage(gi414088275)	1.34e-41
	No	-	-	11	complement(31673..32251)	PHAGE_Caulob_CcrColossus_NC_019406: putative TerD-like bacterial stress protein; PP_00053; phage(gi414088275)	6.11e-42
	No	-	-	12	complement(32300..33340)	PHAGE_Escher_phAPEC8_NC_020079: integral membrane protein TerC; PP_00054; phage(gi448260482)	1.90e-99
	No	-	-	13	complement(33363..33818)	PHAGE_Erwini_vB_EamM_ChrisDB_NC_031126: hypothetical protein; PP_00055; phage(gi100004)	4.23e-07
	-	-	-	14	complement(33841..34998)	hypothetical; PP_00056	0.0
	No	-	-	15	complement(34998..35579)	PHAGE_Bacill_CP_51_NC_025423: putative resistance protein; PP_00057; phage(gi725949538)	3.05e-20
NODE_23				Region 8, total 7 CDS
	converting phage	phenotype	accession number	#	CDS Position	BLAST Hit	E-Value
	No	-	-	1	complement(4557..5117)	PHAGE_Entero_phi92_NC_023693: Phi92_gp065; PP_00005; phage(gi726646998)	2.98e-67
	No	-	-	2	complement(5122..6000)	PHAGE_Entero_phi92_NC_023693: Phi92_gp066; PP_00006; phage(gi726646999)	7.35e-136
	No	-	-	3	complement(6058..6957)	PHAGE_Entero_phi92_NC_023693: Phi92_gp064; PP_00007; phage(gi726646997)	3.60e-36
	No	-	-	4	complement(6957..8042)	PHAGE_Entero_phi92_NC_023693: Phi92_gp067; PP_00008; phage(gi726647000)	4.13e-125
	No	-	-	5	complement(8411..9262)	PHAGE_Entero_phi92_NC_023693: Phi92_gp066; PP_00009; phage(gi726646999)	4.73e-11
	No	-	-	6	complement(9547..10542)	PHAGE_Synech_S_SKS1_NC_020851: nucleotide-sugar epimerase; PP_00010; phage(gi472340882)	2.81e-11
	No	-	-	7	complement(10700..12094)	PHAGE_Entero_phi92_NC_023693: Phi92_gp150; PP_00011; phage(gi726647084)	2.74e-22
				Region 9, total 11 CDS
	converting phage	phenotype	accession number	#	CDS Position	BLAST Hit	E-Value
	No	-	-	1	complement(64048..64302)	PHAGE_Entero_P2_NC_001895: Ogr; PP_00053; phage(gi9630356)	1.25e-49
	No	-	-	2	complement(64348..65511)	PHAGE_Entero_P2_NC_001895: tail protein; PP_00054; phage(gi9630355)	0.0
	No	-	-	3	complement(65511..65990)	PHAGE_Entero_P2_NC_001895: gpU; PP_00055; phage(gi9630354)	1.64e-111
	No	-	-	4	complement(66005..68452)	PHAGE_Entero_P2_NC_001895: gpT; PP_00056; phage(gi9630353)	0.0
	No	-	-	5	complement(68445..68600)	PHAGE_Entero_P2_NC_001895: gpE+E'; PP_00057; phage(gi9630352)	6.64e-32
	No	-	-	6	complement(68597..68872)	PHAGE_Entero_P2_NC_001895: gpE; PP_00058; phage(gi9630351)	1.09e-57
	No	-	-	7	complement(68929..69447)	PHAGE_Entero_P2_NC_001895: major tail tube protein; PP_00059; phage(gi9630350)	9.02e-125
	No	-	-	8	complement(69460..70410)	PHAGE_Entero_P2_NC_001895: major tail sheath protein; PP_00060; phage(gi9630349)	0.0
	No	-	-	9	complement(70469..71323)	PHAGE_Entero_P2_NC_001895: capsid-scaffolding protein; PP_00061; phage(gi9630330)	0.0
	No	-	-	10	71497..73269	PHAGE_Entero_P2_NC_001895: terminase ATPase subunit; PP_00062; phage(gi9630329)	0.0
	No	-	-	11	73269..74303	PHAGE_Entero_P2_NC_001895: portal vertex protein; PP_00063; phage(gi9630328)	0.0
				Region 10, total 6 CDS
	converting phage	phenotype	accession number	#	CDS Position	BLAST Hit	E-Value
	Yes	Cdt-V	NC_022750	1	complement(78311..80575)	PHAGE_Entero_fiAA91_ss_NC_022750: DNA replication; PP_00068; phage(gi557307619)	0.0
	Yes	Cdt-V	NC_022750	2	complement(80565..80840)	PHAGE_Entero_fiAA91_ss_NC_022750: replication initiation protein; PP_00069; phage(gi557307618)	1.50e-62
	Yes	Cdt-V	NC_022750	3	complement(80837..81061)	PHAGE_Entero_fiAA91_ss_NC_022750: zinc finger protein; PP_00070; phage(gi557307615)	2.69e-47
	Yes	Cdt-V	NC_022750	4	complement(81061..81363)	PHAGE_Entero_fiAA91_ss_NC_022750: hypothetical protein; PP_00071; phage(gi557307616)	1.63e-64
	Yes	Cdt-V	NC_022750	5	complement(81363..81587)	PHAGE_Entero_fiAA91_ss_NC_022750: hypothetical protein; PP_00072; phage(gi557307617)	6.07e-48
	Yes	Cdt-V	NC_022750	6	complement(81651..82142)	PHAGE_Entero_fiAA91_ss_NC_022750: DNA replication protein; PP_00073; phage(gi557307614)	1.72e-119
NODE_24				Region 11, total 11 CDS
	converting phage	phenotype	accession number	#	CDS_POSITION	BLAST_HIT	E-VALUE
	No	-	-	1	complement(69339..70622)	PHAGE_Burkho_phi1026b_NC_005284: gp59; PP_00061; phage(gi38707949)	1e-33
	-	-	-	2	71339..71536	hypothetical; PP_00062	0.0
	No	-	-	3	complement(72356..72937)	PHAGE_Entero_HK630_NC_019723: tail fiber assembly protein; PP_00063; phage(gi428782810)	1e-104
	No	-	-	4	complement(72937..73743)	PROPHAGE_Escher_MG1655: Qin prophage; predicted side tail fibre assembly protein; PP_00064; phage(gi16129506)	1e-135
	Yes	Cdt-I	NC_009514	5	complement(73740..75050)	PHAGE_Entero_cdtI_NC_009514: putative large terminase subunit; PP_00065; phage(gi148609384)	0.0
	Yes	Cdt-I	NC_009514	6	complement(75059..75586)	PHAGE_Entero_cdtI_NC_009514: putative small terminase subunit; PP_00066; phage(gi148609383)	2e-96
	No	-	-	7	complement(75755..75886)	PHAGE_Entero_mEp460_NC_019716: hypothetical protein; PP_00067; phage(gi428782375)	2e-19
	No	-	-	8	76279..76572	PHAGE_Entero_lambda_NC_001416: Bor protein precursor; PP_00068; phage(gi19263395)	2e-46
	Yes	Cdt-I	NC_009514	9	complement(76604..77065)	PHAGE_Entero_cdtI_NC_009514: lysin; PP_00069; phage(gi148609441)	9e-59
	Yes	Cdt-I	NC_009514	10	complement(77062..77559)	PHAGE_Entero_cdtI_NC_009514: lysin; PP_00070; phage(gi148609440)	8e-91
	Yes	Cdt-I	NC_009514	11	complement(77559..77765)	PHAGE_Entero_cdtI_NC_009514: lysis protein; PP_00071; phage(gi148609439)	9e-33
NODE_29				Region 12, total 11 CDS
	converting phage	phenotype	accession number	#	CDS Position	BLAST Hit	E-Value
	No	-	-	1	1468..1833	PROPHAGE_Escher_CFT073: transposase insC; PP_00002; phage(gi26249447)	3.99e-57
	No	-	-	2	1791..2696	PROPHAGE_Shigel_301: insertion element IS2 transposase InsD; PP_00003; phage(gi24111655)	0.0
	-	-	-	3	complement(2667..3782)	hypothetical; PP_00004	0.0
	-	-	-	4	4087..4218	hypothetical; PP_00005	0.0
	Yes	stx2c	NC_008464	5	complement(4247..4858)	PHAGE_Stx2_c_86_NC_008464: hypothetical protein; PP_00006; phage(gi116222037)	1.70e-07
	No	-	-	6	complement(4879..5142)	PHAGE_Escher_Lw1_NC_021344: hypothetical protein; PP_00007; phage(gi509141780)	1.10e-12
	No	-	-	7	complement(5236..5997)	PHAGE_Thalas_BA3_NC_009990: hypothetical protein; PP_00008; phage(gi160700596)	4.86e-22
	-	-	-	8	complement(6078..6842)	hypothetical; PP_00009	0.0
	-	-	-	9	7050..7166	hypothetical; PP_00010	0.0
	-	-	-	10	7163..7687	hypothetical; PP_00011	0.0
	No	-	-	11	7791..8228	PHAGE_Azospi_Cd_NC_010355: hypothetical protein; PP_00012; phage(gi168495172)	4.02e-16
